# Supplementary material for: Age-related susceptibility to insulin resistance arises from a combination of CPT1B decline and lipid overload
Source: PubMed Central journal article supplement (PMC8323306; doi:10.1186/s12915-021-01082-5), 2021-07-30
Supplement: 12915_2021_1082_MOESM9_ESM.pdf [file 12915_2021_1082_MOESM9_ESM.pdf]

# Kinetic model

## Definitions of the various functions

CPT1[sf\_, V\_, Kms1\_, Kms2\_, Kmp1\_, Kmp2\_, Ki1\_, Keq\_, S1\_, S2\_, P1\_, P2\_, I1\_, n\_] :=

$$\frac{sf * V * \left( \frac{S1 * S2}{Kms1 * Kms2} - \frac{P1 * P2}{Kms1 * Kms2 * Keq} \right)}{\left( 1 + \frac{S1}{Kms1} + \frac{P1}{Kmp1} + \left( \frac{I1}{Ki1} \right)^n \right) * \left( 1 + \frac{S2}{Kms2} + \frac{P2}{Kmp2} \right)}$$

CACT[Vf\_, Vr\_, Kms1\_, Kms2\_, Kmp1\_, Kmp2\_, Kis1\_, Kip2\_, Keq\_, S1\_, S2\_, P1\_, P2\_] :=

$$\left( Vf * \left( S1 * S2 - \frac{P1 * P2}{Keq} \right) \right) / \left( S1 * S2 + Kms2 * S1 + Kms1 * S2 * \left( 1 + \frac{P2}{Kip2} \right) + \frac{Vf}{Vr * Keq} * \left( Kmp2 * P1 * \left( 1 + \frac{S1}{Kis1} \right) + P2 * (Kmp1 + P1) \right) \right)$$

CPT2[sf\_, V\_, Kms1\_, Kms2\_, Kms3\_, Kms4\_, Kms5\_, Kms6\_, Kms7\_, Kms8\_,

Kmp1\_, Kmp2\_, Kmp3\_, Kmp4\_, Kmp5\_, Kmp6\_, Kmp7\_, Kmp8\_, Keq\_, S1\_, S2\_, S3\_, S4\_, S5\_, S6\_, S7\_, S8\_, P1\_, P2\_, P3\_, P4\_, P5\_, P6\_, P7\_, P8\_] :=

$$\left( sf * V * \left( \frac{S1 * S8}{Kms1 * Kms8} - \frac{P1 * P8}{Kms1 * Kms8 * Keq} \right) \right) / \left( \left( 1 + \frac{S1}{Kms1} + \frac{P1}{Kmp1} + \frac{S2}{Kms2} + \frac{P2}{Kmp2} + \frac{S3}{Kms3} + \frac{P3}{Kmp3} + \frac{S4}{Kms4} + \frac{P4}{Kmp4} + \frac{S5}{Kms5} + \frac{P5}{Kmp5} + \frac{S6}{Kms6} + \frac{P6}{Kmp6} + \frac{S7}{Kms7} + \frac{P7}{Kmp7} \right) * \left( 1 + \frac{S8}{Kms8} + \frac{P8}{Kmp8} \right) \right)$$

VLCAD[sf\_, V\_, Kms1\_, Kms2\_, Kms3\_, Kms4\_, Kmp1\_, Kmp2\_,

Kmp3\_, Kmp4\_, Keq\_, S1\_, S2\_, S3\_, S4\_, P1\_, P2\_, P3\_, P4\_] :=

$$\frac{sf * V * \left( \frac{S1 * (S4 - P4)}{Kms1 * Kms4} - \frac{P1 * P4}{Kms1 * Kms4 * Keq} \right)}{\left( 1 + \frac{S1}{Kms1} + \frac{P1}{Kmp1} + \frac{S2}{Kms2} + \frac{P2}{Kmp2} + \frac{S3}{Kms3} + \frac{P3}{Kmp3} \right) * \left( 1 + \frac{(S4 - P4)}{Kms4} + \frac{P4}{Kmp4} \right)}$$

LCAD[sf\_, V\_, Kms1\_, Kms2\_, Kms3\_, Kms4\_, Kms5\_, Kms6\_, Kmp1\_, Kmp2\_, Kmp3\_, Kmp4\_,

Kmp5\_, Kmp6\_, Keq\_, S1\_, S2\_, S3\_, S4\_, S5\_, S6\_, P1\_, P2\_, P3\_, P4\_, P5\_, P6\_] :=

$$\left( sf * V * \left( \frac{S1 * (S6 - P6)}{Kms1 * Kms6} - \frac{P1 * P6}{Kms1 * Kms6 * Keq} \right) \right) / \left( \left( 1 + \frac{S1}{Kms1} + \frac{P1}{Kmp1} + \frac{S2}{Kms2} + \frac{P2}{Kmp2} + \frac{S3}{Kms3} + \frac{P3}{Kmp3} + \frac{S4}{Kms4} + \frac{P4}{Kmp4} + \frac{S5}{Kms5} + \frac{P5}{Kmp5} \right) * \left( 1 + \frac{(S6 - P6)}{Kms6} + \frac{P6}{Kmp6} \right) \right)$$

MCAD[sf\_, V\_, Kms1\_, Kms2\_, Kms3\_, Kms4\_, Kms5\_, Kms6\_, Kmp1\_, Kmp2\_, Kmp3\_, Kmp4\_,

Kmp5\_, Kmp6\_, Keq\_, S1\_, S2\_, S3\_, S4\_, S5\_, S6\_, P1\_, P2\_, P3\_, P4\_, P5\_, P6\_] :=

$$\left( sf * V * \left( \frac{S1 * (S6 - P6)}{Kms1 * Kms6} - \frac{P1 * P6}{Kms1 * Kms6 * Keq} \right) \right) / \left( \left( 1 + \frac{S1}{Kms1} + \frac{P1}{Kmp1} + \frac{S2}{Kms2} + \frac{P2}{Kmp2} + \frac{S3}{Kms3} + \frac{P3}{Kmp3} + \frac{S4}{Kms4} + \frac{P4}{Kmp4} + \frac{S5}{Kms5} + \frac{P5}{Kmp5} \right) * \left( 1 + \frac{(S6 - P6)}{Kms6} + \frac{P6}{Kmp6} \right) \right)$$

$$\text{SCAD}[sf\_ , V\_ , Kms1\_ , Kms2\_ , Kms3\_ , Kmp1\_ , Kmp2\_ , Kmp3\_ , Keq\_ , S1\_ , S2\_ , S3\_ , P1\_ , P2\_ , P3\_ ] := \frac{sf * V * \left( \frac{S1 * (S3 - P3)}{Kms1 * Kms3} - \frac{P1 * P3}{Kms1 * Kms3 * Keq} \right)}{\left( 1 + \frac{S1}{Kms1} + \frac{P1}{Kmp1} + \frac{S2}{Kms2} + \frac{P2}{Kmp2} \right) * \left( 1 + \frac{(S3 - P3)}{Kms3} + \frac{P3}{Kmp3} \right)}$$

$$\text{CROT}[sf\_ , V\_ , Kms1\_ , Kms2\_ , Kms3\_ , Kms4\_ , Kms5\_ , Kms6\_ , Kms7\_ , Kmp1\_ , Kmp2\_ , Kmp3\_ , Kmp4\_ , Kmp5\_ , Kmp6\_ , Kmp7\_ , Ki1\_ , Keq\_ , S1\_ , S2\_ , S3\_ , S4\_ , S5\_ , S6\_ , S7\_ , P1\_ , P2\_ , P3\_ , P4\_ , P5\_ , P6\_ , P7\_ , I1\_ ] := \frac{\left( sf * V * \left( \frac{S1}{Kms1} - \frac{P1}{Kms1 * Keq} \right) \right)}{\left( 1 + \frac{S1}{Kms1} + \frac{P1}{Kmp1} + \frac{S2}{Kms2} + \frac{P2}{Kmp2} + \frac{S3}{Kms3} + \frac{P3}{Kmp3} + \frac{S4}{Kms4} + \frac{P4}{Kmp4} + \frac{S5}{Kms5} + \frac{P5}{Kmp5} + \frac{S6}{Kms6} + \frac{P6}{Kmp6} + \frac{S7}{Kms7} + \frac{P7}{Kmp7} + \frac{I1}{Ki1} \right)}$$

$$\text{MSCHAD}[sf\_ , V\_ , Kms1\_ , Kms2\_ , Kms3\_ , Kms4\_ , Kms5\_ , Kms6\_ , Kms7\_ , Kms8\_ , Kmp1\_ , Kmp2\_ , Kmp3\_ , Kmp4\_ , Kmp5\_ , Kmp6\_ , Kmp7\_ , Kmp8\_ , Keq\_ , S1\_ , S2\_ , S3\_ , S4\_ , S5\_ , S6\_ , S7\_ , S8\_ , P1\_ , P2\_ , P3\_ , P4\_ , P5\_ , P6\_ , P7\_ , P8\_ ] := \left( sf * V * \left( \frac{S1 * (S8 - P8)}{Kms1 * Kms8} - \frac{P1 * P8}{Kms1 * Kms8 * Keq} \right) \right) / \left( \left( 1 + \frac{S1}{Kms1} + \frac{P1}{Kmp1} + \frac{S2}{Kms2} + \frac{P2}{Kmp2} + \frac{S3}{Kms3} + \frac{P3}{Kmp3} + \frac{S4}{Kms4} + \frac{P4}{Kmp4} + \frac{S5}{Kms5} + \frac{P5}{Kmp5} + \frac{S6}{Kms6} + \frac{P6}{Kmp6} + \frac{S7}{Kms7} + \frac{P7}{Kmp7} \right) * \left( 1 + \frac{(S8 - P8)}{Kms8} + \frac{P8}{Kmp8} \right) \right)$$

$$\text{MCKATA}[sf\_ , V\_ , Kms1\_ , Kms2\_ , Kms3\_ , Kms4\_ , Kms5\_ , Kms6\_ , Kms7\_ , Kms8\_ , Kmp1\_ , Kmp2\_ , Kmp3\_ , Kmp4\_ , Kmp5\_ , Kmp6\_ , Kmp7\_ , Kmp8\_ , Keq\_ , S1\_ , S2\_ , S3\_ , S4\_ , S5\_ , S6\_ , S7\_ , S8\_ , P1\_ , P2\_ , P3\_ , P4\_ , P5\_ , P6\_ , P7\_ , P8\_ ] := \left( sf * V * \left( \frac{S1 * S8}{Kms1 * Kms8} - \frac{P1 * P8}{Kms1 * Kms8 * Keq} \right) \right) / \left( \left( 1 + \frac{S1}{Kms1} + \frac{P1}{Kmp1} + \frac{S2}{Kms2} + \frac{P2}{Kmp2} + \frac{S3}{Kms3} + \frac{P3}{Kmp3} + \frac{S4}{Kms4} + \frac{P4}{Kmp4} + \frac{S5}{Kms5} + \frac{P5}{Kmp5} + \frac{S6}{Kms6} + \frac{P6}{Kmp6} + \frac{S7}{Kms7} + \frac{P7}{Kmp7} + \frac{P8}{Kmp8} \right) * \left( 1 + \frac{S8}{Kms8} + \frac{P8}{Kmp8} \right) \right)$$

$$\text{MCKATB}[sf\_ , V\_ , Kms1\_ , Kms2\_ , Kms3\_ , Kms4\_ , Kms5\_ , Kms6\_ , Kms7\_ , Kms8\_ , Kmp1\_ , Kmp2\_ , Kmp3\_ , Kmp4\_ , Kmp5\_ , Kmp6\_ , Kmp7\_ , Kmp8\_ , Keq\_ , S1\_ , S2\_ , S3\_ , S4\_ , S5\_ , S6\_ , S7\_ , S8\_ , P1\_ , P2\_ , P3\_ , P4\_ , P5\_ , P6\_ , P7\_ , P8\_ ] := \left( sf * V * \left( \frac{S1 * S8}{Kms1 * Kms8} - \frac{P8 * P8}{Kms1 * Kms8 * Keq} \right) \right) / \left( \left( 1 + \frac{S1}{Kms1} + \frac{S2}{Kms2} + \frac{P2}{Kmp2} + \frac{S3}{Kms3} + \frac{P3}{Kmp3} + \frac{S4}{Kms4} + \frac{P4}{Kmp4} + \frac{S5}{Kms5} + \frac{P5}{Kmp5} + \frac{S6}{Kms6} + \frac{P6}{Kmp6} + \frac{S7}{Kms7} + \frac{P7}{Kmp7} + \frac{P8}{Kmp8} \right) * \left( 1 + \frac{S8}{Kms8} + \frac{P8}{Kmp8} \right) \right)$$

$$\text{MTP}[sf\_ , V\_ , Kms1\_ , Kms2\_ , Kms3\_ , Kms4\_ , Kms5\_ , Kms7\_ , Kms8\_ , Kmp1\_ , Kmp2\_ , Kmp3\_ , Kmp4\_ , Kmp5\_ , Kmp6\_ , Kmp7\_ , Kmp8\_ , Ki1\_ , Keq\_ , S1\_ , S2\_ , S3\_ , S4\_ , S5\_ , S7\_ , S8\_ , P1\_ , P2\_ , P3\_ , P4\_ , P5\_ , P6\_ , P7\_ , P8\_ , I1\_ ] := \left( sf * V * \left( \frac{S1 * (S7 - P7) * S8}{Kms1 * Kms7 * Kms8} - \frac{P1 * P7 * P8}{Kms1 * Kms7 * Kms8 * Keq} \right) \right) / \left( \left( 1 + \frac{S1}{Kms1} + \frac{P1}{Kmp1} + \frac{S2}{Kms2} + \frac{P2}{Kmp2} + \frac{S3}{Kms3} + \frac{P3}{Kmp3} + \frac{S4}{Kms4} + \frac{P4}{Kmp4} + \frac{S5}{Kms5} + \frac{P5}{Kmp5} + \frac{P6}{Kmp6} + \frac{I1}{Ki1} \right) * \left( 1 + \frac{(S7 - P7)}{Kms7} + \frac{P7}{Kmp7} \right) * \left( 1 + \frac{S8}{Kms8} + \frac{P8}{Kmp8} \right) \right)$$

RES [Ks\_, S\_, K1\_] := Ks \* (S - K1)

## Define the differential equations

Odes = {

$$C16AcylCarCYT' [t] == \frac{vcpt1C16 - vcactC16}{VCYT},$$

$$C16AcylCarMAT' [t] == \frac{vcactC16 - vcpt2C16}{VMAT},$$

$$C16AcylCoAMAT' [t] == \frac{vcpt2C16 - vvlcadC16 - vlcadC16}{VMAT},$$

$$C16EnoylCoAMAT' [t] == \frac{vvlcadC16 + vlcadC16 - vcrotC16 - vmtpC16}{VMAT},$$

$$C16HydroxyacylCoAMAT' [t] == \frac{vcrotC16 - vmschadC16}{VMAT},$$

$$C16KetoacylCoAMAT' [t] == \frac{vmschadC16 - vmckatC16}{VMAT},$$

$$C14AcylCarCYT' [t] == \frac{-vcactC14}{VCYT},$$

$$C14AcylCarMAT' [t] == \frac{vcactC14 - vcpt2C14}{VMAT},$$

$$C14AcylCoAMAT' [t] == \frac{1}{VMAT} (vcpt2C14 + vmtpC16 + vmckatC16 - vvlcadC14 - vlcadC14),$$

$$C14EnoylCoAMAT' [t] == \frac{vvlcadC14 + vlcadC14 - vcrotC14 - vmtpC14}{VMAT},$$

$$C14HydroxyacylCoAMAT' [t] == \frac{vcrotC14 - vmschadC14}{VMAT},$$

$$C14KetoacylCoAMAT' [t] == \frac{vmschadC14 - vmckatC14}{VMAT},$$

$$C12AcylCarCYT' [t] == \frac{-vcactC12}{VCYT},$$

$$C12AcylCarMAT' [t] == \frac{vcactC12 - vcpt2C12}{VMAT},$$

$$C12AcylCoAMAT' [t] == \frac{1}{VMAT} (vcpt2C12 + vmtpC14 + vmckatC14 - vvlcadC12 - vlcadC12 - vmcadC12),$$

$$C12EnoylCoAMAT' [t] == \frac{1}{VMAT} (vvlcadC12 + vlcadC12 + vmcadC12 - vcrotC12 - vmtpC12),$$

$$C12HydroxyacylCoAMAT' [t] == \frac{vcrotC12 - vmschadC12}{VMAT},$$

$$C12KetoacylCoAMAT' [t] == \frac{vmschadC12 - vmckatC12}{VMAT},$$

$$C10AcylCarCYT' [t] == \frac{-vcactC10}{VCYT},$$

$$C10AcylCarMAT' [t] == \frac{vcactC10 - vcpt2C10}{VMAT},$$

$$\begin{aligned}
C10AcylCoAMAT' [t] &= \frac{1}{VMAT} (vcpt2C10 + vmtpC12 + vmckatC12 - vlcadC10 - vmcadC10), \\
C10EnoylCoAMAT' [t] &= \frac{vlcadC10 + vmcadC10 - vcrotC10 - vmtpC10}{VMAT}, \\
C10HydroxyacylCoAMAT' [t] &= \frac{vcrotC10 - vmschadC10}{VMAT}, \\
C10KetoacylCoAMAT' [t] &= \frac{vmschadC10 - vmckatC10}{VMAT}, \\
C8AcylCarCYT' [t] &= \frac{-vcactC8}{VCYT}, \\
C8AcylCarMAT' [t] &= \frac{vcactC8 - vcpt2C8}{VMAT}, \\
C8AcylCoAMAT' [t] &= \frac{vcpt2C8 + vmtpC10 + vmckatC10 - vlcadC8 - vmcadC8}{VMAT}, \\
C8EnoylCoAMAT' [t] &= \frac{vlcadC8 + vmcadC8 - vcrotC8 - vmtpC8}{VMAT}, \\
C8HydroxyacylCoAMAT' [t] &= \frac{vcrotC8 - vmschadC8}{VMAT}, \\
C8KetoacylCoAMAT' [t] &= \frac{vmschadC8 - vmckatC8}{VMAT}, \\
C6AcylCarCYT' [t] &= \frac{-vcactC6}{VCYT}, \\
C6AcylCarMAT' [t] &= \frac{vcactC6 - vcpt2C6}{VMAT}, \\
C6AcylCoAMAT' [t] &= \frac{vcpt2C6 + vmtpC8 + vmckatC8 - vmcadC6 - vscadC6}{VMAT}, \\
C6EnoylCoAMAT' [t] &= \frac{vmcadC6 + vscadC6 - vcrotC6}{VMAT}, \\
C6HydroxyacylCoAMAT' [t] &= \frac{vcrotC6 - vmschadC6}{VMAT}, \\
C6KetoacylCoAMAT' [t] &= \frac{vmschadC6 - vmckatC6}{VMAT}, \\
C4AcylCarCYT' [t] &= \frac{-vcactC4}{VCYT}, \\
C4AcylCarMAT' [t] &= \frac{vcactC4 - vcpt2C4}{VMAT}, \\
C4AcylCoAMAT' [t] &= \frac{vcpt2C4 + vmckatC6 - vmcadC4 - vscadC4}{VMAT}, \\
C4EnoylCoAMAT' [t] &= \frac{vmcadC4 + vscadC4 - vcrotC4}{VMAT}, \\
C4HydroxyacylCoAMAT' [t] &= \frac{vcrotC4 - vmschadC4}{VMAT}, \\
C4AcetoacylCoAMAT' [t] &= \frac{vmschadC4 - vmckatC4}{VMAT}, \\
AcetylCoAMAT' [t] &= \\
&\frac{1}{VMAT} (vmtpC16 + vmckatC16 + vmtpC14 + vmckatC14 + vmtpC12 + vmckatC12 + vmtpC10 +
\end{aligned}$$

$$\begin{aligned}
& \text{vmckatC10} + \text{vmtpC8} + \text{vmckatC8} + \text{vmckatC6} + 2 * \text{vmckatC4} - \text{vacesink}), \\
\text{FADHMAT}'[t] &= \frac{1}{\text{VMAT}} (\text{vvlcadC16} + \text{vvlcadC14} + \text{vvlcadC12} + \text{vlcadC16} + \\
& \text{vlcadC14} + \text{vlcadC12} + \text{vlcadC10} + \text{vlcadC8} + \text{vmcadC12} + \text{vmcadC10} + \\
& \text{vmcadC8} + \text{vmcadC6} + \text{vmcadC4} + \text{vscadC6} + \text{vscadC4} - \text{vfadhsink}), \\
\text{NADHMAT}'[t] &= \frac{1}{\text{VMAT}} (\text{vmtpC16} + \text{vmtpC14} + \text{vmtpC12} + \text{vmtpC10} + \text{vmtpC8} + \\
& \text{vmschadC16} + \text{vmschadC14} + \text{vmschadC12} + \text{vmschadC10} + \\
& \text{vmschadC8} + \text{vmschadC6} + \text{vmschadC4} - \text{vnadhsink}) \};
\end{aligned}$$

RateEqs = {

```

vcpt1C16 → CPT1[sfcpt1C16, Vcpt1, Kmcpt1C16AcylCoACYT, Kmcpt1CarCYT,
  Kmcpt1C16AcylCarCYT, Kmcpt1CoACYT, Kicpt1MalCoACYT, Keqcpt1,
  C16AcylCoACYT, CarCYT, C16AcylCarCYT[t], CoACYT, MalCoACYT, ncpt1],
vcactC16 → CACT[Vfcact, Vrcact, KmcactC16AcylCarCYT, KmcactCarMAT,
  KmcactC16AcylCarMAT, KmcactCarCYT, KicactC16AcylCarCYT, KicactCarCYT,
  Keqcact, C16AcylCarCYT[t], CarMAT, C16AcylCarMAT[t], CarCYT],
vcactC14 → CACT[Vfcact, Vrcact, KmcactC14AcylCarCYT, KmcactCarMAT,
  KmcactC14AcylCarMAT, KmcactCarCYT, KicactC14AcylCarCYT, KicactCarCYT,
  Keqcact, C14AcylCarCYT[t], CarMAT, C14AcylCarMAT[t], CarCYT],
vcactC12 → CACT[Vfcact, Vrcact, KmcactC12AcylCarCYT, KmcactCarMAT,
  KmcactC12AcylCarMAT, KmcactCarCYT, KicactC12AcylCarCYT, KicactCarCYT,
  Keqcact, C12AcylCarCYT[t], CarMAT, C12AcylCarMAT[t], CarCYT],
vcactC10 → CACT[Vfcact, Vrcact, KmcactC10AcylCarCYT, KmcactCarMAT,
  KmcactC10AcylCarMAT, KmcactCarCYT, KicactC10AcylCarCYT, KicactCarCYT,
  Keqcact, C10AcylCarCYT[t], CarMAT, C10AcylCarMAT[t], CarCYT],
vcactC8 → CACT[Vfcact, Vrcact, KmcactC8AcylCarCYT, KmcactCarMAT,
  KmcactC8AcylCarMAT, KmcactCarCYT, KicactC8AcylCarCYT, KicactCarCYT,
  Keqcact, C8AcylCarCYT[t], CarMAT, C8AcylCarMAT[t], CarCYT],
vcactC6 → CACT[Vfcact, Vrcact, KmcactC6AcylCarCYT, KmcactCarMAT,
  KmcactC6AcylCarMAT, KmcactCarCYT, KicactC6AcylCarCYT, KicactCarCYT,
  Keqcact, C6AcylCarCYT[t], CarMAT, C6AcylCarMAT[t], CarCYT],
vcactC4 → CACT[Vfcact, Vrcact, KmcactC4AcylCarCYT, KmcactCarMAT,
  KmcactC4AcylCarMAT, KmcactCarCYT, KicactC4AcylCarCYT, KicactCarCYT,
  Keqcact, C4AcylCarCYT[t], CarMAT, C4AcylCarMAT[t], CarCYT],
vcpt2C16 → CPT2[sfcpt2C16, Vcpt2, Kmcpt2C16AcylCarMAT, Kmcpt2C14AcylCarMAT,
  Kmcpt2C12AcylCarMAT, Kmcpt2C10AcylCarMAT, Kmcpt2C8AcylCarMAT, Kmcpt2C6AcylCarMAT,
  Kmcpt2C4AcylCarMAT, Kmcpt2CoAMAT, Kmcpt2C16AcylCoAMAT, Kmcpt2C14AcylCoAMAT,
  Kmcpt2C12AcylCoAMAT, Kmcpt2C10AcylCoAMAT, Kmcpt2C8AcylCoAMAT, Kmcpt2C6AcylCoAMAT,
  Kmcpt2C4AcylCoAMAT, Kmcpt2CarMAT, Keqcpt2, C16AcylCarMAT[t], C14AcylCarMAT[t],
  C12AcylCarMAT[t], C10AcylCarMAT[t], C8AcylCarMAT[t], C6AcylCarMAT[t],
  C4AcylCarMAT[t], CoAMAT, C16AcylCoAMAT[t], C14AcylCoAMAT[t], C12AcylCoAMAT[t],
  C10AcylCoAMAT[t], C8AcylCoAMAT[t], C6AcylCoAMAT[t], C4AcylCoAMAT[t], CarMAT],
vcpt2C14 → CPT2[sfcpt2C14, Vcpt2, Kmcpt2C14AcylCarMAT, Kmcpt2C16AcylCarMAT,
  Kmcpt2C12AcylCarMAT, Kmcpt2C10AcylCarMAT, Kmcpt2C8AcylCarMAT, Kmcpt2C6AcylCarMAT,
  Kmcpt2C4AcylCoAMAT, Kmcpt2CoAMAT, Kmcpt2C14AcylCoAMAT, Kmcpt2C16AcylCoAMAT,
  Kmcpt2C12AcylCoAMAT, Kmcpt2C10AcylCoAMAT, Kmcpt2C8AcylCoAMAT, Kmcpt2C6AcylCoAMAT,
  Kmcpt2C4AcylCoAMAT, Kmcpt2CarMAT, Keqcpt2, C14AcylCarMAT[t], C16AcylCarMAT[t],
  C12AcylCarMAT[t], C10AcylCarMAT[t], C8AcylCarMAT[t], C6AcylCarMAT[t],

```

C4AcylCarMAT[t], CoAMAT, C14AcylCoAMAT[t], C16AcylCoAMAT[t], C12AcylCoAMAT[t],  
 C10AcylCoAMAT[t], C8AcylCoAMAT[t], C6AcylCoAMAT[t], C4AcylCoAMAT[t], CarMAT],  
 vcpt2C12 → CPT2[sfcpt2C12, Vcpt2, Kmcpt2C12AcylCarMAT, Kmcpt2C16AcylCarMAT,  
 Kmcpt2C14AcylCarMAT, Kmcpt2C10AcylCarMAT, Kmcpt2C8AcylCarMAT, Kmcpt2C6AcylCarMAT,  
 Kmcpt2C4AcylCarMAT, Kmcpt2CoAMAT, Kmcpt2C12AcylCoAMAT, Kmcpt2C16AcylCoAMAT,  
 Kmcpt2C14AcylCoAMAT, Kmcpt2C10AcylCoAMAT, Kmcpt2C8AcylCoAMAT, Kmcpt2C6AcylCoAMAT,  
 Kmcpt2C4AcylCoAMAT, Kmcpt2CarMAT, Keqcpt2, C12AcylCarMAT[t], C16AcylCarMAT[t],  
 C14AcylCarMAT[t], C10AcylCarMAT[t], C8AcylCarMAT[t], C6AcylCarMAT[t],  
 C4AcylCarMAT[t], CoAMAT, C12AcylCoAMAT[t], C16AcylCoAMAT[t], C14AcylCoAMAT[t],  
 C10AcylCoAMAT[t], C8AcylCoAMAT[t], C6AcylCoAMAT[t], C4AcylCoAMAT[t], CarMAT],  
 vcpt2C10 → CPT2[sfcpt2C10, Vcpt2, Kmcpt2C10AcylCarMAT, Kmcpt2C16AcylCarMAT,  
 Kmcpt2C14AcylCarMAT, Kmcpt2C12AcylCarMAT, Kmcpt2C8AcylCarMAT, Kmcpt2C6AcylCarMAT,  
 Kmcpt2C4AcylCarMAT, Kmcpt2CoAMAT, Kmcpt2C10AcylCoAMAT, Kmcpt2C16AcylCoAMAT,  
 Kmcpt2C14AcylCoAMAT, Kmcpt2C12AcylCoAMAT, Kmcpt2C8AcylCoAMAT, Kmcpt2C6AcylCoAMAT,  
 Kmcpt2C4AcylCoAMAT, Kmcpt2CarMAT, Keqcpt2, C10AcylCarMAT[t], C16AcylCarMAT[t],  
 C14AcylCarMAT[t], C12AcylCarMAT[t], C8AcylCarMAT[t], C6AcylCarMAT[t],  
 C4AcylCarMAT[t], CoAMAT, C10AcylCoAMAT[t], C16AcylCoAMAT[t], C14AcylCoAMAT[t],  
 C12AcylCoAMAT[t], C8AcylCoAMAT[t], C6AcylCoAMAT[t], C4AcylCoAMAT[t], CarMAT],  
 vcpt2C8 → CPT2[sfcpt2C8, Vcpt2, Kmcpt2C8AcylCarMAT, Kmcpt2C16AcylCarMAT,  
 Kmcpt2C14AcylCarMAT, Kmcpt2C12AcylCarMAT, Kmcpt2C10AcylCarMAT, Kmcpt2C6AcylCarMAT,  
 Kmcpt2C4AcylCarMAT, Kmcpt2CoAMAT, Kmcpt2C8AcylCoAMAT, Kmcpt2C16AcylCoAMAT,  
 Kmcpt2C14AcylCoAMAT, Kmcpt2C12AcylCoAMAT, Kmcpt2C10AcylCoAMAT, Kmcpt2C6AcylCoAMAT,  
 Kmcpt2C4AcylCoAMAT, Kmcpt2CarMAT, Keqcpt2, C8AcylCarMAT[t], C16AcylCarMAT[t],  
 C14AcylCarMAT[t], C12AcylCarMAT[t], C10AcylCarMAT[t], C6AcylCarMAT[t],  
 C4AcylCarMAT[t], CoAMAT, C8AcylCoAMAT[t], C16AcylCoAMAT[t], C14AcylCoAMAT[t],  
 C12AcylCoAMAT[t], C10AcylCoAMAT[t], C6AcylCoAMAT[t], C4AcylCoAMAT[t], CarMAT],  
 vcpt2C6 → CPT2[sfcpt2C6, Vcpt2, Kmcpt2C6AcylCarMAT, Kmcpt2C16AcylCarMAT,  
 Kmcpt2C14AcylCarMAT, Kmcpt2C12AcylCarMAT, Kmcpt2C10AcylCarMAT, Kmcpt2C8AcylCarMAT,  
 Kmcpt2C4AcylCarMAT, Kmcpt2CoAMAT, Kmcpt2C6AcylCoAMAT, Kmcpt2C16AcylCoAMAT,  
 Kmcpt2C14AcylCoAMAT, Kmcpt2C12AcylCoAMAT, Kmcpt2C10AcylCoAMAT, Kmcpt2C8AcylCoAMAT,  
 Kmcpt2C4AcylCoAMAT, Kmcpt2CarMAT, Keqcpt2, C6AcylCarMAT[t], C16AcylCarMAT[t],  
 C14AcylCarMAT[t], C12AcylCarMAT[t], C10AcylCarMAT[t], C8AcylCarMAT[t],  
 C4AcylCarMAT[t], CoAMAT, C6AcylCoAMAT[t], C16AcylCoAMAT[t], C14AcylCoAMAT[t],  
 C12AcylCoAMAT[t], C10AcylCoAMAT[t], C8AcylCoAMAT[t], C4AcylCoAMAT[t], CarMAT],  
 vcpt2C4 → CPT2[sfcpt2C4, Vcpt2, Kmcpt2C4AcylCarMAT, Kmcpt2C16AcylCarMAT,  
 Kmcpt2C14AcylCarMAT, Kmcpt2C12AcylCarMAT, Kmcpt2C10AcylCarMAT, Kmcpt2C8AcylCarMAT,  
 Kmcpt2C6AcylCarMAT, Kmcpt2CoAMAT, Kmcpt2C4AcylCoAMAT, Kmcpt2C16AcylCoAMAT,  
 Kmcpt2C14AcylCoAMAT, Kmcpt2C12AcylCoAMAT, Kmcpt2C10AcylCoAMAT, Kmcpt2C8AcylCoAMAT,  
 Kmcpt2C6AcylCoAMAT, Kmcpt2CarMAT, Keqcpt2, C4AcylCarMAT[t], C16AcylCarMAT[t],  
 C14AcylCarMAT[t], C12AcylCarMAT[t], C10AcylCarMAT[t], C8AcylCarMAT[t],  
 C6AcylCarMAT[t], CoAMAT, C4AcylCoAMAT[t], C16AcylCoAMAT[t], C14AcylCoAMAT[t],  
 C12AcylCoAMAT[t], C10AcylCoAMAT[t], C8AcylCoAMAT[t], C6AcylCoAMAT[t], CarMAT],  
 vvlcadC16 → VLCAD[sfvvlcadC16, Vvlcad, KmvvlcadC16AcylCoAMAT, KmvvlcadC14AcylCoAMAT,  
 KmvvlcadC12AcylCoAMAT, KmvvlcadFAD, KmvvlcadC16EnoylCoAMAT,  
 KmvvlcadC14EnoylCoAMAT, KmvvlcadC12EnoylCoAMAT, KmvvlcadFADH, Keqvlcad,  
 C16AcylCoAMAT[t], C14AcylCoAMAT[t], C12AcylCoAMAT[t], FADtMAT,  
 C16EnoylCoAMAT[t], C14EnoylCoAMAT[t], C12EnoylCoAMAT[t], FADHMAT[t]],  
 vvlcadC14 → VLCAD[sfvvlcadC14, Vvlcad, KmvvlcadC14AcylCoAMAT, KmvvlcadC16AcylCoAMAT,  
 KmvvlcadC12AcylCoAMAT, KmvvlcadFAD, KmvvlcadC14EnoylCoAMAT,  
 KmvvlcadC16EnoylCoAMAT, KmvvlcadC12EnoylCoAMAT, KmvvlcadFADH, Keqvlcad,

C14AcylCoAMAT[t], C16AcylCoAMAT[t], C12AcylCoAMAT[t], FADtMAT,  
 C14EnoylCoAMAT[t], C16EnoylCoAMAT[t], C12EnoylCoAMAT[t], FADHMAT[t]],  
 vvlcadC12 → VLCAD[sfvlcadC12, Vvlcad, KmvvlcadC12AcylCoAMAT, KmvvlcadC16AcylCoAMAT,  
 KmvvlcadC14AcylCoAMAT, KmvvlcadFAD, KmvvlcadC12EnoylCoAMAT,  
 KmvvlcadC16EnoylCoAMAT, KmvvlcadC14EnoylCoAMAT, KmvvlcadFADH, Keqvlcad,  
 C12AcylCoAMAT[t], C16AcylCoAMAT[t], C14AcylCoAMAT[t], FADtMAT,  
 C12EnoylCoAMAT[t], C16EnoylCoAMAT[t], C14EnoylCoAMAT[t], FADHMAT[t]],  
 vlcadC16 → LCAD[sflcadC16, Vlcad, KmlcadC16AcylCoAMAT, KmlcadC14AcylCoAMAT,  
 KmlcadC12AcylCoAMAT, KmlcadC10AcylCoAMAT, KmlcadC8AcylCoAMAT, KmlcadFAD,  
 KmlcadC16EnoylCoAMAT, KmlcadC14EnoylCoAMAT, KmlcadC12EnoylCoAMAT,  
 KmlcadC10EnoylCoAMAT, KmlcadC8EnoylCoAMAT, KmlcadFADH, Keqlcad,  
 C16AcylCoAMAT[t], C14AcylCoAMAT[t], C12AcylCoAMAT[t], C10AcylCoAMAT[t],  
 C8AcylCoAMAT[t], FADtMAT, C16EnoylCoAMAT[t], C14EnoylCoAMAT[t],  
 C12EnoylCoAMAT[t], C10EnoylCoAMAT[t], C8EnoylCoAMAT[t], FADHMAT[t]],  
 vlcadC14 → LCAD[sflcadC14, Vlcad, KmlcadC14AcylCoAMAT, KmlcadC16AcylCoAMAT,  
 KmlcadC12AcylCoAMAT, KmlcadC10AcylCoAMAT, KmlcadC8AcylCoAMAT, KmlcadFAD,  
 KmlcadC14EnoylCoAMAT, KmlcadC16EnoylCoAMAT, KmlcadC12EnoylCoAMAT,  
 KmlcadC10EnoylCoAMAT, KmlcadC8EnoylCoAMAT, KmlcadFADH, Keqlcad,  
 C14AcylCoAMAT[t], C16AcylCoAMAT[t], C12AcylCoAMAT[t], C10AcylCoAMAT[t],  
 C8AcylCoAMAT[t], FADtMAT, C14EnoylCoAMAT[t], C16EnoylCoAMAT[t],  
 C12EnoylCoAMAT[t], C10EnoylCoAMAT[t], C8EnoylCoAMAT[t], FADHMAT[t]],  
 vlcadC12 → LCAD[sflcadC12, Vlcad, KmlcadC12AcylCoAMAT, KmlcadC16AcylCoAMAT,  
 KmlcadC14AcylCoAMAT, KmlcadC10AcylCoAMAT, KmlcadC8AcylCoAMAT, KmlcadFAD,  
 KmlcadC12EnoylCoAMAT, KmlcadC16EnoylCoAMAT, KmlcadC14EnoylCoAMAT,  
 KmlcadC10EnoylCoAMAT, KmlcadC8EnoylCoAMAT, KmlcadFADH, Keqlcad,  
 C12AcylCoAMAT[t], C16AcylCoAMAT[t], C14AcylCoAMAT[t], C10AcylCoAMAT[t],  
 C8AcylCoAMAT[t], FADtMAT, C14EnoylCoAMAT[t], C16EnoylCoAMAT[t],  
 C14EnoylCoAMAT[t], C10EnoylCoAMAT[t], C8EnoylCoAMAT[t], FADHMAT[t]],  
 vlcadC10 → LCAD[sflcadC10, Vlcad, KmlcadC10AcylCoAMAT, KmlcadC16AcylCoAMAT,  
 KmlcadC14AcylCoAMAT, KmlcadC12AcylCoAMAT, KmlcadC8AcylCoAMAT, KmlcadFAD,  
 KmlcadC10EnoylCoAMAT, KmlcadC16EnoylCoAMAT, KmlcadC14EnoylCoAMAT,  
 KmlcadC12EnoylCoAMAT, KmlcadC8EnoylCoAMAT, KmlcadFADH, Keqlcad,  
 C10AcylCoAMAT[t], C16AcylCoAMAT[t], C14AcylCoAMAT[t], C12AcylCoAMAT[t],  
 C8AcylCoAMAT[t], FADtMAT, C10EnoylCoAMAT[t], C16EnoylCoAMAT[t],  
 C14EnoylCoAMAT[t], C12EnoylCoAMAT[t], C8EnoylCoAMAT[t], FADHMAT[t]],  
 vlcadC8 → LCAD[sflcadC8, Vlcad, KmlcadC8AcylCoAMAT, KmlcadC16AcylCoAMAT,  
 KmlcadC14AcylCoAMAT, KmlcadC12AcylCoAMAT, KmlcadC10AcylCoAMAT, KmlcadFAD,  
 KmlcadC8EnoylCoAMAT, KmlcadC16EnoylCoAMAT, KmlcadC14EnoylCoAMAT,  
 KmlcadC12EnoylCoAMAT, KmlcadC10EnoylCoAMAT, KmlcadFADH, Keqlcad,  
 C8AcylCoAMAT[t], C16AcylCoAMAT[t], C14AcylCoAMAT[t], C12AcylCoAMAT[t],  
 C10AcylCoAMAT[t], FADtMAT, C8EnoylCoAMAT[t], C16EnoylCoAMAT[t],  
 C14EnoylCoAMAT[t], C12EnoylCoAMAT[t], C10EnoylCoAMAT[t], FADHMAT[t]],  
 vmcadC12 → MCAD[sfmcadC12, Vmcad, KmmcadC12AcylCoAMAT, KmmcadC10AcylCoAMAT,  
 KmmcadC8AcylCoAMAT, KmmcadC6AcylCoAMAT, KmmcadC4AcylCoAMAT, KmmcadFAD,  
 KmmcadC12EnoylCoAMAT, KmmcadC10EnoylCoAMAT, KmmcadC8EnoylCoAMAT,  
 KmmcadC6EnoylCoAMAT, KmmcadC4EnoylCoAMAT, KmmcadFADH, Keqmcad,  
 C12AcylCoAMAT[t], C10AcylCoAMAT[t], C8AcylCoAMAT[t], C6AcylCoAMAT[t],  
 C4AcylCoAMAT[t], FADtMAT, C12EnoylCoAMAT[t], C10EnoylCoAMAT[t],  
 C8EnoylCoAMAT[t], C6EnoylCoAMAT[t], C4EnoylCoAMAT[t], FADHMAT[t]],  
 vmcadC10 → MCAD[sfmcadC10, Vmcad, KmmcadC10AcylCoAMAT, KmmcadC12AcylCoAMAT,

KmmcadC8AcylCoAMAT, KmmcadC6AcylCoAMAT, KmmcadC4AcylCoAMAT, KmmcadFAD,  
 KmmcadC10EnoylCoAMAT, KmmcadC12EnoylCoAMAT, KmmcadC8EnoylCoAMAT,  
 KmmcadC6EnoylCoAMAT, KmmcadC4EnoylCoAMAT, KmmcadFADH, Keqmcad,  
 C10AcylCoAMAT[t], C12AcylCoAMAT[t], C8AcylCoAMAT[t], C6AcylCoAMAT[t],  
 C4AcylCoAMAT[t], FADtMAT, C10EnoylCoAMAT[t], C12EnoylCoAMAT[t],  
 C8EnoylCoAMAT[t], C6EnoylCoAMAT[t], C4EnoylCoAMAT[t], FADHMAT[t]],  
 vmcadC8 → MCAD[sfmcadC8, Vmcad, KmmcadC8AcylCoAMAT, KmmcadC12AcylCoAMAT,  
 KmmcadC10AcylCoAMAT, KmmcadC6AcylCoAMAT, KmmcadC4AcylCoAMAT, KmmcadFAD,  
 KmmcadC8EnoylCoAMAT, KmmcadC12EnoylCoAMAT, KmmcadC10EnoylCoAMAT,  
 KmmcadC6EnoylCoAMAT, KmmcadC4EnoylCoAMAT, KmmcadFADH, Keqmcad,  
 C8AcylCoAMAT[t], C12AcylCoAMAT[t], C10AcylCoAMAT[t], C6AcylCoAMAT[t],  
 C4AcylCoAMAT[t], FADtMAT, C8EnoylCoAMAT[t], C12EnoylCoAMAT[t],  
 C10EnoylCoAMAT[t], C6EnoylCoAMAT[t], C4EnoylCoAMAT[t], FADHMAT[t]],  
 vmcadC6 → MCAD[sfmcadC6, Vmcad, KmmcadC6AcylCoAMAT, KmmcadC12AcylCoAMAT,  
 KmmcadC10AcylCoAMAT, KmmcadC8AcylCoAMAT, KmmcadC4AcylCoAMAT, KmmcadFAD,  
 KmmcadC6EnoylCoAMAT, KmmcadC12EnoylCoAMAT, KmmcadC10EnoylCoAMAT,  
 KmmcadC8EnoylCoAMAT, KmmcadC4EnoylCoAMAT, KmmcadFADH, Keqmcad,  
 C6AcylCoAMAT[t], C12AcylCoAMAT[t], C10AcylCoAMAT[t], C8AcylCoAMAT[t],  
 C4AcylCoAMAT[t], FADtMAT, C6EnoylCoAMAT[t], C12EnoylCoAMAT[t],  
 C10EnoylCoAMAT[t], C8EnoylCoAMAT[t], C4EnoylCoAMAT[t], FADHMAT[t]],  
 vmcadC4 → MCAD[sfmcadC4, Vmcad, KmmcadC4AcylCoAMAT, KmmcadC12AcylCoAMAT,  
 KmmcadC10AcylCoAMAT, KmmcadC8AcylCoAMAT, KmmcadC6AcylCoAMAT, KmmcadFAD,  
 KmmcadC4EnoylCoAMAT, KmmcadC12EnoylCoAMAT, KmmcadC10EnoylCoAMAT,  
 KmmcadC8EnoylCoAMAT, KmmcadC6EnoylCoAMAT, KmmcadFADH, Keqmcad,  
 C4AcylCoAMAT[t], C12AcylCoAMAT[t], C10AcylCoAMAT[t], C8AcylCoAMAT[t],  
 C6AcylCoAMAT[t], FADtMAT, C4EnoylCoAMAT[t], C12EnoylCoAMAT[t],  
 C10EnoylCoAMAT[t], C8EnoylCoAMAT[t], C6EnoylCoAMAT[t], FADHMAT[t]],  
 vscadC6 → SCAD[sfscadC6, Vscad, KmscadC6AcylCoAMAT, KmscadC4AcylCoAMAT, KmscadFAD,  
 KmscadC6EnoylCoAMAT, KmscadC4EnoylCoAMAT, KmscadFADH, Keqscad, C6AcylCoAMAT[t],  
 C4AcylCoAMAT[t], FADtMAT, C6EnoylCoAMAT[t], C4EnoylCoAMAT[t], FADHMAT[t]],  
 vscadC4 → SCAD[sfscadC4, Vscad, KmscadC4AcylCoAMAT, KmscadC6AcylCoAMAT, KmscadFAD,  
 KmscadC4EnoylCoAMAT, KmscadC6EnoylCoAMAT, KmscadFADH, Keqscad, C4AcylCoAMAT[t],  
 C6AcylCoAMAT[t], FADtMAT, C4EnoylCoAMAT[t], C6EnoylCoAMAT[t], FADHMAT[t]],  
 vcrotC16 → CROT[sfcrotC16, Vcrot, KmcrotC16EnoylCoAMAT, KmcrotC14EnoylCoAMAT,  
 KmcrotC12EnoylCoAMAT, KmcrotC10EnoylCoAMAT, KmcrotC8EnoylCoAMAT,  
 KmcrotC6EnoylCoAMAT, KmcrotC4EnoylCoAMAT, KmcrotC16HydroxyacylCoAMAT,  
 KmcrotC14HydroxyacylCoAMAT, KmcrotC12HydroxyacylCoAMAT,  
 KmcrotC10HydroxyacylCoAMAT, KmcrotC8HydroxyacylCoAMAT,  
 KmcrotC6HydroxyacylCoAMAT, KmcrotC4HydroxyacylCoAMAT, KicrotC4AcetoacylCoA,  
 Keqcrot, C16EnoylCoAMAT[t], C14EnoylCoAMAT[t], C12EnoylCoAMAT[t],  
 C10EnoylCoAMAT[t], C8EnoylCoAMAT[t], C6EnoylCoAMAT[t],  
 C4EnoylCoAMAT[t], C16HydroxyacylCoAMAT[t], C14HydroxyacylCoAMAT[t],  
 C12HydroxyacylCoAMAT[t], C10HydroxyacylCoAMAT[t], C8HydroxyacylCoAMAT[t],  
 C6HydroxyacylCoAMAT[t], C4HydroxyacylCoAMAT[t], C4AcetoacylCoAMAT[t]],  
 vcrotC14 → CROT[sfcrotC14, Vcrot, KmcrotC14EnoylCoAMAT, KmcrotC16EnoylCoAMAT,  
 KmcrotC12EnoylCoAMAT, KmcrotC10EnoylCoAMAT, KmcrotC8EnoylCoAMAT,  
 KmcrotC6EnoylCoAMAT, KmcrotC4EnoylCoAMAT, KmcrotC14HydroxyacylCoAMAT,  
 KmcrotC16HydroxyacylCoAMAT, KmcrotC12HydroxyacylCoAMAT,  
 KmcrotC10HydroxyacylCoAMAT, KmcrotC8HydroxyacylCoAMAT,  
 KmcrotC6HydroxyacylCoAMAT, KmcrotC4HydroxyacylCoAMAT, KicrotC4AcetoacylCoA,



Keqcrot, C14EnoylCoAMAT[t], C16EnoylCoAMAT[t], C12EnoylCoAMAT[t],  
 C10EnoylCoAMAT[t], C8EnoylCoAMAT[t], C6EnoylCoAMAT[t],  
 C4EnoylCoAMAT[t], C14HydroxyacylCoAMAT[t], C16HydroxyacylCoAMAT[t],  
 C12HydroxyacylCoAMAT[t], C10HydroxyacylCoAMAT[t], C8HydroxyacylCoAMAT[t],  
 C6HydroxyacylCoAMAT[t], C4HydroxyacylCoAMAT[t], C4AcetoacylCoAMAT[t]],  
 vcrotC12 → CROT[sfcrotC12, Vcrot, KmcrotC12EnoylCoAMAT, KmcrotC16EnoylCoAMAT,  
 KmcrotC14EnoylCoAMAT, KmcrotC10EnoylCoAMAT, KmcrotC8EnoylCoAMAT,  
 KmcrotC6EnoylCoAMAT, KmcrotC4EnoylCoAMAT, KmcrotC12HydroxyacylCoAMAT,  
 KmcrotC16HydroxyacylCoAMAT, KmcrotC14HydroxyacylCoAMAT,  
 KmcrotC10HydroxyacylCoAMAT, KmcrotC8HydroxyacylCoAMAT,  
 KmcrotC6HydroxyacylCoAMAT, KmcrotC4HydroxyacylCoAMAT, KicrotC4AcetoacylCoA,  
 Keqcrot, C12EnoylCoAMAT[t], C16EnoylCoAMAT[t], C14EnoylCoAMAT[t],  
 C10EnoylCoAMAT[t], C8EnoylCoAMAT[t], C6EnoylCoAMAT[t],  
 C4EnoylCoAMAT[t], C12HydroxyacylCoAMAT[t], C16HydroxyacylCoAMAT[t],  
 C14HydroxyacylCoAMAT[t], C10HydroxyacylCoAMAT[t], C8HydroxyacylCoAMAT[t],  
 C6HydroxyacylCoAMAT[t], C4HydroxyacylCoAMAT[t], C4AcetoacylCoAMAT[t]],  
 vcrotC10 → CROT[sfcrotC10, Vcrot, KmcrotC10EnoylCoAMAT, KmcrotC16EnoylCoAMAT,  
 KmcrotC14EnoylCoAMAT, KmcrotC12EnoylCoAMAT, KmcrotC8EnoylCoAMAT,  
 KmcrotC6EnoylCoAMAT, KmcrotC4EnoylCoAMAT, KmcrotC10HydroxyacylCoAMAT,  
 KmcrotC16HydroxyacylCoAMAT, KmcrotC14HydroxyacylCoAMAT,  
 KmcrotC12HydroxyacylCoAMAT, KmcrotC8HydroxyacylCoAMAT,  
 KmcrotC6HydroxyacylCoAMAT, KmcrotC4HydroxyacylCoAMAT, KicrotC4AcetoacylCoA,  
 Keqcrot, C10EnoylCoAMAT[t], C16EnoylCoAMAT[t], C14EnoylCoAMAT[t],  
 C12EnoylCoAMAT[t], C8EnoylCoAMAT[t], C6EnoylCoAMAT[t],  
 C4EnoylCoAMAT[t], C10HydroxyacylCoAMAT[t], C16HydroxyacylCoAMAT[t],  
 C14HydroxyacylCoAMAT[t], C12HydroxyacylCoAMAT[t], C8HydroxyacylCoAMAT[t],  
 C6HydroxyacylCoAMAT[t], C4HydroxyacylCoAMAT[t], C4AcetoacylCoAMAT[t]],  
 vcrotC8 → CROT[sfcrotC8, Vcrot, KmcrotC8EnoylCoAMAT, KmcrotC16EnoylCoAMAT,  
 KmcrotC14EnoylCoAMAT, KmcrotC12EnoylCoAMAT, KmcrotC10EnoylCoAMAT,  
 KmcrotC6EnoylCoAMAT, KmcrotC4EnoylCoAMAT, KmcrotC8HydroxyacylCoAMAT,  
 KmcrotC16HydroxyacylCoAMAT, KmcrotC14HydroxyacylCoAMAT,  
 KmcrotC12HydroxyacylCoAMAT, KmcrotC10HydroxyacylCoAMAT,  
 KmcrotC6HydroxyacylCoAMAT, KmcrotC4HydroxyacylCoAMAT, KicrotC4AcetoacylCoA,  
 Keqcrot, C8EnoylCoAMAT[t], C16EnoylCoAMAT[t], C14EnoylCoAMAT[t],  
 C12EnoylCoAMAT[t], C10EnoylCoAMAT[t], C6EnoylCoAMAT[t],  
 C4EnoylCoAMAT[t], C8HydroxyacylCoAMAT[t], C16HydroxyacylCoAMAT[t],  
 C14HydroxyacylCoAMAT[t], C12HydroxyacylCoAMAT[t], C10HydroxyacylCoAMAT[t],  
 C6HydroxyacylCoAMAT[t], C4HydroxyacylCoAMAT[t], C4AcetoacylCoAMAT[t]],  
 vcrotC6 → CROT[sfcrotC6, Vcrot, KmcrotC6EnoylCoAMAT, KmcrotC16EnoylCoAMAT,  
 KmcrotC14EnoylCoAMAT, KmcrotC12EnoylCoAMAT, KmcrotC10EnoylCoAMAT,  
 KmcrotC8EnoylCoAMAT, KmcrotC4EnoylCoAMAT, KmcrotC6HydroxyacylCoAMAT,  
 KmcrotC16HydroxyacylCoAMAT, KmcrotC14HydroxyacylCoAMAT,  
 KmcrotC12HydroxyacylCoAMAT, KmcrotC10HydroxyacylCoAMAT,  
 KmcrotC8HydroxyacylCoAMAT, KmcrotC4HydroxyacylCoAMAT, KicrotC4AcetoacylCoA,  
 Keqcrot, C6EnoylCoAMAT[t], C16EnoylCoAMAT[t], C14EnoylCoAMAT[t],  
 C12EnoylCoAMAT[t], C10EnoylCoAMAT[t], C8EnoylCoAMAT[t],  
 C4EnoylCoAMAT[t], C6HydroxyacylCoAMAT[t], C16HydroxyacylCoAMAT[t],  
 C14HydroxyacylCoAMAT[t], C12HydroxyacylCoAMAT[t], C10HydroxyacylCoAMAT[t],  
 C8HydroxyacylCoAMAT[t], C4HydroxyacylCoAMAT[t], C4AcetoacylCoAMAT[t]],  
 vcrotC4 → CROT[sfcrotC4, Vcrot, KmcrotC4EnoylCoAMAT, KmcrotC16EnoylCoAMAT,

KmcrotC14EnoylCoAMAT, KmcrotC12EnoylCoAMAT, KmcrotC10EnoylCoAMAT,  
 KmcrotC8EnoylCoAMAT, KmcrotC6EnoylCoAMAT, KmcrotC4HydroxyacylCoAMAT,  
 KmcrotC16HydroxyacylCoAMAT, KmcrotC14HydroxyacylCoAMAT,  
 KmcrotC12HydroxyacylCoAMAT, KmcrotC10HydroxyacylCoAMAT,  
 KmcrotC8HydroxyacylCoAMAT, KmcrotC6HydroxyacylCoAMAT, KicrotC4AcetoacylCoA,  
 Keqcrot, C4EnoylCoAMAT [t], C16EnoylCoAMAT [t], C14EnoylCoAMAT [t],  
 C12EnoylCoAMAT [t], C10EnoylCoAMAT [t], C8EnoylCoAMAT [t],  
 C6EnoylCoAMAT [t], C4HydroxyacylCoAMAT [t], C16HydroxyacylCoAMAT [t],  
 C14HydroxyacylCoAMAT [t], C12HydroxyacylCoAMAT [t], C10HydroxyacylCoAMAT [t],  
 C8HydroxyacylCoAMAT [t], C6HydroxyacylCoAMAT [t], C4AcetoacylCoAMAT [t]],  
 vmschadC16 → MSCHAD[sfmschadC16, Vmschad, KmmschadC16HydroxyacylCoAMAT,  
 KmmschadC14HydroxyacylCoAMAT, KmmschadC12HydroxyacylCoAMAT,  
 KmmschadC10HydroxyacylCoAMAT, KmmschadC8HydroxyacylCoAMAT,  
 KmmschadC6HydroxyacylCoAMAT, KmmschadC4HydroxyacylCoAMAT,  
 KmmschadNADMAT, KmmschadC16KetoacylCoAMAT, KmmschadC14KetoacylCoAMAT,  
 KmmschadC12KetoacylCoAMAT, KmmschadC10KetoacylCoAMAT, KmmschadC8KetoacylCoAMAT,  
 KmmschadC6KetoacylCoAMAT, KmmschadC4AcetoacylCoAMAT, KmmschadNADHMAT,  
 Keqmschad, C16HydroxyacylCoAMAT [t], C14HydroxyacylCoAMAT [t],  
 C12HydroxyacylCoAMAT [t], C10HydroxyacylCoAMAT [t], C8HydroxyacylCoAMAT [t],  
 C6HydroxyacylCoAMAT [t], C4HydroxyacylCoAMAT [t], NADtMAT, C16KetoacylCoAMAT [t],  
 C14KetoacylCoAMAT [t], C12KetoacylCoAMAT [t], C10KetoacylCoAMAT [t],  
 C8KetoacylCoAMAT [t], C6KetoacylCoAMAT [t], C4AcetoacylCoAMAT [t], NADHMAT [t]],  
 vmschadC14 → MSCHAD[sfmschadC14, Vmschad, KmmschadC14HydroxyacylCoAMAT,  
 KmmschadC16HydroxyacylCoAMAT, KmmschadC12HydroxyacylCoAMAT,  
 KmmschadC10HydroxyacylCoAMAT, KmmschadC8HydroxyacylCoAMAT,  
 KmmschadC6HydroxyacylCoAMAT, KmmschadC4HydroxyacylCoAMAT,  
 KmmschadNADMAT, KmmschadC14KetoacylCoAMAT, KmmschadC16KetoacylCoAMAT,  
 KmmschadC12KetoacylCoAMAT, KmmschadC10KetoacylCoAMAT, KmmschadC8KetoacylCoAMAT,  
 KmmschadC6KetoacylCoAMAT, KmmschadC4AcetoacylCoAMAT, KmmschadNADHMAT,  
 Keqmschad, C14HydroxyacylCoAMAT [t], C16HydroxyacylCoAMAT [t],  
 C12HydroxyacylCoAMAT [t], C10HydroxyacylCoAMAT [t], C8HydroxyacylCoAMAT [t],  
 C6HydroxyacylCoAMAT [t], C4HydroxyacylCoAMAT [t], NADtMAT, C14KetoacylCoAMAT [t],  
 C16KetoacylCoAMAT [t], C12KetoacylCoAMAT [t], C10KetoacylCoAMAT [t],  
 C8KetoacylCoAMAT [t], C6KetoacylCoAMAT [t], C4AcetoacylCoAMAT [t], NADHMAT [t]],  
 vmschadC12 → MSCHAD[sfmschadC12, Vmschad, KmmschadC12HydroxyacylCoAMAT,  
 KmmschadC16HydroxyacylCoAMAT, KmmschadC14HydroxyacylCoAMAT,  
 KmmschadC10HydroxyacylCoAMAT, KmmschadC8HydroxyacylCoAMAT,  
 KmmschadC6HydroxyacylCoAMAT, KmmschadC4HydroxyacylCoAMAT,  
 KmmschadNADMAT, KmmschadC12KetoacylCoAMAT, KmmschadC16KetoacylCoAMAT,  
 KmmschadC14KetoacylCoAMAT, KmmschadC10KetoacylCoAMAT, KmmschadC8KetoacylCoAMAT,  
 KmmschadC6KetoacylCoAMAT, KmmschadC4AcetoacylCoAMAT, KmmschadNADHMAT,  
 Keqmschad, C12HydroxyacylCoAMAT [t], C16HydroxyacylCoAMAT [t],  
 C14HydroxyacylCoAMAT [t], C10HydroxyacylCoAMAT [t], C8HydroxyacylCoAMAT [t],  
 C6HydroxyacylCoAMAT [t], C4HydroxyacylCoAMAT [t], NADtMAT, C12KetoacylCoAMAT [t],  
 C16KetoacylCoAMAT [t], C14KetoacylCoAMAT [t], C10KetoacylCoAMAT [t],  
 C8KetoacylCoAMAT [t], C6KetoacylCoAMAT [t], C4AcetoacylCoAMAT [t], NADHMAT [t]],  
 vmschadC10 → MSCHAD[sfmschadC10, Vmschad, KmmschadC10HydroxyacylCoAMAT,  
 KmmschadC16HydroxyacylCoAMAT, KmmschadC14HydroxyacylCoAMAT,  
 KmmschadC12HydroxyacylCoAMAT, KmmschadC8HydroxyacylCoAMAT,  
 KmmschadC6HydroxyacylCoAMAT, KmmschadC4HydroxyacylCoAMAT,

KmmschadNADMAT, KmmschadC10KetoacylCoAMAT, KmmschadC16KetoacylCoAMAT,  
 KmmschadC14KetoacylCoAMAT, KmmschadC12KetoacylCoAMAT, KmmschadC8KetoacylCoAMAT,  
 KmmschadC6KetoacylCoAMAT, KmmschadC4AcetoacylCoAMAT, KmmschadNADHMAT,  
 Keqmschad, C10HydroxyacylCoAMAT [t], C16HydroxyacylCoAMAT [t],  
 C14HydroxyacylCoAMAT [t], C12HydroxyacylCoAMAT [t], C8HydroxyacylCoAMAT [t],  
 C6HydroxyacylCoAMAT [t], C4HydroxyacylCoAMAT [t], NADtMAT, C10KetoacylCoAMAT [t],  
 C16KetoacylCoAMAT [t], C14KetoacylCoAMAT [t], C12KetoacylCoAMAT [t],  
 C8KetoacylCoAMAT [t], C6KetoacylCoAMAT [t], C4AcetoacylCoAMAT [t], NADHMAT [t]],  
 vmschadC8 → MSCHAD [sfmschadC8, Vmschad, KmmschadC8HydroxyacylCoAMAT,  
 KmmschadC16HydroxyacylCoAMAT, KmmschadC14HydroxyacylCoAMAT,  
 KmmschadC12HydroxyacylCoAMAT, KmmschadC10HydroxyacylCoAMAT,  
 KmmschadC6HydroxyacylCoAMAT, KmmschadC4HydroxyacylCoAMAT,  
 KmmschadNADMAT, KmmschadC8KetoacylCoAMAT, KmmschadC16KetoacylCoAMAT,  
 KmmschadC14KetoacylCoAMAT, KmmschadC12KetoacylCoAMAT, KmmschadC10KetoacylCoAMAT,  
 KmmschadC6KetoacylCoAMAT, KmmschadC4AcetoacylCoAMAT, KmmschadNADHMAT,  
 Keqmschad, C8HydroxyacylCoAMAT [t], C16HydroxyacylCoAMAT [t],  
 C14HydroxyacylCoAMAT [t], C12HydroxyacylCoAMAT [t], C10HydroxyacylCoAMAT [t],  
 C6HydroxyacylCoAMAT [t], C4HydroxyacylCoAMAT [t], NADtMAT, C8KetoacylCoAMAT [t],  
 C16KetoacylCoAMAT [t], C14KetoacylCoAMAT [t], C12KetoacylCoAMAT [t],  
 C10KetoacylCoAMAT [t], C6KetoacylCoAMAT [t], C4AcetoacylCoAMAT [t], NADHMAT [t]],  
 vmschadC6 → MSCHAD [sfmschadC6, Vmschad, KmmschadC6HydroxyacylCoAMAT,  
 KmmschadC16HydroxyacylCoAMAT, KmmschadC14HydroxyacylCoAMAT,  
 KmmschadC12HydroxyacylCoAMAT, KmmschadC10HydroxyacylCoAMAT,  
 KmmschadC8HydroxyacylCoAMAT, KmmschadC4HydroxyacylCoAMAT,  
 KmmschadNADMAT, KmmschadC6KetoacylCoAMAT, KmmschadC16KetoacylCoAMAT,  
 KmmschadC14KetoacylCoAMAT, KmmschadC12KetoacylCoAMAT, KmmschadC10KetoacylCoAMAT,  
 KmmschadC8KetoacylCoAMAT, KmmschadC4AcetoacylCoAMAT, KmmschadNADHMAT,  
 Keqmschad, C6HydroxyacylCoAMAT [t], C16HydroxyacylCoAMAT [t],  
 C14HydroxyacylCoAMAT [t], C12HydroxyacylCoAMAT [t], C10HydroxyacylCoAMAT [t],  
 C8HydroxyacylCoAMAT [t], C4HydroxyacylCoAMAT [t], NADtMAT, C6KetoacylCoAMAT [t],  
 C16KetoacylCoAMAT [t], C14KetoacylCoAMAT [t], C12KetoacylCoAMAT [t],  
 C10KetoacylCoAMAT [t], C8KetoacylCoAMAT [t], C4AcetoacylCoAMAT [t], NADHMAT [t]],  
 vmschadC4 → MSCHAD [sfmschadC4, Vmschad, KmmschadC4HydroxyacylCoAMAT,  
 KmmschadC16HydroxyacylCoAMAT, KmmschadC14HydroxyacylCoAMAT,  
 KmmschadC12HydroxyacylCoAMAT, KmmschadC10HydroxyacylCoAMAT,  
 KmmschadC8HydroxyacylCoAMAT, KmmschadC6HydroxyacylCoAMAT,  
 KmmschadNADMAT, KmmschadC4AcetoacylCoAMAT, KmmschadC16KetoacylCoAMAT,  
 KmmschadC14KetoacylCoAMAT, KmmschadC12KetoacylCoAMAT, KmmschadC10KetoacylCoAMAT,  
 KmmschadC8KetoacylCoAMAT, KmmschadC6KetoacylCoAMAT, KmmschadNADHMAT,  
 Keqmschad, C4HydroxyacylCoAMAT [t], C16HydroxyacylCoAMAT [t],  
 C14HydroxyacylCoAMAT [t], C12HydroxyacylCoAMAT [t], C10HydroxyacylCoAMAT [t],  
 C8HydroxyacylCoAMAT [t], C6HydroxyacylCoAMAT [t], NADtMAT, C4AcetoacylCoAMAT [t],  
 C16KetoacylCoAMAT [t], C14KetoacylCoAMAT [t], C12KetoacylCoAMAT [t],  
 C10KetoacylCoAMAT [t], C8KetoacylCoAMAT [t], C6KetoacylCoAMAT [t], NADHMAT [t]],  
 vmckatC16 → MCKATA [sfmckatC16, Vmckat, KmmckatC16KetoacylCoAMAT,  
 KmmckatC14KetoacylCoAMAT, KmmckatC12KetoacylCoAMAT, KmmckatC10KetoacylCoAMAT,  
 KmmckatC8KetoacylCoAMAT, KmmckatC6KetoacylCoAMAT, KmmckatC4AcetoacylCoAMAT,  
 KmmckatCoAMAT, KmmckatC14AcylCoAMAT, KmmckatC16AcylCoAMAT, KmmckatC12AcylCoAMAT,  
 KmmckatC10AcylCoAMAT, KmmckatC8AcylCoAMAT, KmmckatC6AcylCoAMAT,  
 KmmckatC4AcylCoAMAT, KmmckatAcetylCoAMAT, Keqmckat, C16KetoacylCoAMAT [t],



C16KetoacylCoAMAT [t], C14KetoacylCoAMAT [t], C12KetoacylCoAMAT [t],  
 C10KetoacylCoAMAT [t], C8KetoacylCoAMAT [t], C4AcetoacylCoAMAT [t], CoAMAT,  
 C4AcylCoAMAT [t], C16AcylCoAMAT [t], C14AcylCoAMAT [t], C12AcylCoAMAT [t],  
 C10AcylCoAMAT [t], C8AcylCoAMAT [t], C6AcylCoAMAT [t], AcetylCoAMAT [t]],  
 vmckatC4 → MCKATB [sfmckatC4, Vmckat, KmmckatC4AcetoacylCoAMAT,  
 KmmckatC16KetoacylCoAMAT, KmmckatC14KetoacylCoAMAT, KmmckatC12KetoacylCoAMAT,  
 KmmckatC10KetoacylCoAMAT, KmmckatC8KetoacylCoAMAT, KmmckatC6KetoacylCoAMAT,  
 KmmckatCoAMAT, KmmckatC4AcylCoAMAT, KmmckatC16AcylCoAMAT, KmmckatC14AcylCoAMAT,  
 KmmckatC12AcylCoAMAT, KmmckatC10AcylCoAMAT, KmmckatC8AcylCoAMAT,  
 KmmckatC6AcylCoAMAT, KmmckatAcetylCoAMAT, Keqmckat, C4AcetoacylCoAMAT [t],  
 C16KetoacylCoAMAT [t], C14KetoacylCoAMAT [t], C12KetoacylCoAMAT [t],  
 C10KetoacylCoAMAT [t], C8KetoacylCoAMAT [t], C6KetoacylCoAMAT [t], CoAMAT,  
 C4AcylCoAMAT [t], C16AcylCoAMAT [t], C14AcylCoAMAT [t], C12AcylCoAMAT [t],  
 C10AcylCoAMAT [t], C8AcylCoAMAT [t], C6AcylCoAMAT [t], AcetylCoAMAT [t]],  
 vmtpC16 → MTP [sfmtpC16, Vmtp, KmmtpC16EnoylCoAMAT, KmmtpC14EnoylCoAMAT,  
 KmmtpC12EnoylCoAMAT, KmmtpC10EnoylCoAMAT, KmmtpC8EnoylCoAMAT,  
 KmmtpNADMAT, KmmtpCoAMAT, KmmtpC14AcylCoAMAT, KmmtpC16AcylCoAMAT,  
 KmmtpC12AcylCoAMAT, KmmtpC10AcylCoAMAT, KmmtpC8AcylCoAMAT,  
 KmmtpC6AcylCoAMAT, KmmtpNADHMAT, KmmtpAcetylCoAMAT, KicrotC4AcetoacylCoA,  
 Keqmt, C16EnoylCoAMAT [t], C14EnoylCoAMAT [t], C12EnoylCoAMAT [t],  
 C10EnoylCoAMAT [t], C8EnoylCoAMAT [t], NADtMAT, CoAMAT, C14AcylCoAMAT [t],  
 C16AcylCoAMAT [t], C12AcylCoAMAT [t], C10AcylCoAMAT [t], C8AcylCoAMAT [t],  
 C6AcylCoAMAT [t], NADHMAT [t], AcetylCoAMAT [t], C4AcetoacylCoAMAT [t]],  
 vmtpC14 → MTP [sfmtpC14, Vmtp, KmmtpC14EnoylCoAMAT, KmmtpC16EnoylCoAMAT,  
 KmmtpC12EnoylCoAMAT, KmmtpC10EnoylCoAMAT, KmmtpC8EnoylCoAMAT,  
 KmmtpNADMAT, KmmtpCoAMAT, KmmtpC12AcylCoAMAT, KmmtpC16AcylCoAMAT,  
 KmmtpC14AcylCoAMAT, KmmtpC10AcylCoAMAT, KmmtpC8AcylCoAMAT,  
 KmmtpC6AcylCoAMAT, KmmtpNADHMAT, KmmtpAcetylCoAMAT, KicrotC4AcetoacylCoA,  
 Keqmt, C14EnoylCoAMAT [t], C16EnoylCoAMAT [t], C12EnoylCoAMAT [t],  
 C10EnoylCoAMAT [t], C8EnoylCoAMAT [t], NADtMAT, CoAMAT, C12AcylCoAMAT [t],  
 C16AcylCoAMAT [t], C14AcylCoAMAT [t], C10AcylCoAMAT [t], C8AcylCoAMAT [t],  
 C6AcylCoAMAT [t], NADHMAT [t], AcetylCoAMAT [t], C4AcetoacylCoAMAT [t]],  
 vmtpC12 → MTP [sfmtpC12, Vmtp, KmmtpC12EnoylCoAMAT, KmmtpC16EnoylCoAMAT,  
 KmmtpC14EnoylCoAMAT, KmmtpC10EnoylCoAMAT, KmmtpC8EnoylCoAMAT,  
 KmmtpNADMAT, KmmtpCoAMAT, KmmtpC10AcylCoAMAT, KmmtpC16AcylCoAMAT,  
 KmmtpC14AcylCoAMAT, KmmtpC12AcylCoAMAT, KmmtpC8AcylCoAMAT,  
 KmmtpC6AcylCoAMAT, KmmtpNADHMAT, KmmtpAcetylCoAMAT, KicrotC4AcetoacylCoA,  
 Keqmt, C12EnoylCoAMAT [t], C16EnoylCoAMAT [t], C14EnoylCoAMAT [t],  
 C10EnoylCoAMAT [t], C8EnoylCoAMAT [t], NADtMAT, CoAMAT, C10AcylCoAMAT [t],  
 C16AcylCoAMAT [t], C14AcylCoAMAT [t], C12AcylCoAMAT [t], C8AcylCoAMAT [t],  
 C6AcylCoAMAT [t], NADHMAT [t], AcetylCoAMAT [t], C4AcetoacylCoAMAT [t]],  
 vmtpC10 → MTP [sfmtpC10, Vmtp, KmmtpC10EnoylCoAMAT, KmmtpC16EnoylCoAMAT,  
 KmmtpC14EnoylCoAMAT, KmmtpC12EnoylCoAMAT, KmmtpC8EnoylCoAMAT,  
 KmmtpNADMAT, KmmtpCoAMAT, KmmtpC8AcylCoAMAT, KmmtpC16AcylCoAMAT,  
 KmmtpC14AcylCoAMAT, KmmtpC12AcylCoAMAT, KmmtpC10AcylCoAMAT,  
 KmmtpC6AcylCoAMAT, KmmtpNADHMAT, KmmtpAcetylCoAMAT, KicrotC4AcetoacylCoA,  
 Keqmt, C10EnoylCoAMAT [t], C16EnoylCoAMAT [t], C14EnoylCoAMAT [t],  
 C12EnoylCoAMAT [t], C8EnoylCoAMAT [t], NADtMAT, CoAMAT, C8AcylCoAMAT [t],  
 C16AcylCoAMAT [t], C14AcylCoAMAT [t], C12AcylCoAMAT [t], C10AcylCoAMAT [t],  
 C6AcylCoAMAT [t], NADHMAT [t], AcetylCoAMAT [t], C4AcetoacylCoAMAT [t]],

```

vmtpc8 → MTP[sfmpc8, Vmtpc, KmmtpC8EnoylCoAMAT, KmmtpC16EnoylCoAMAT,
KmmtpC14EnoylCoAMAT, KmmtpC12EnoylCoAMAT, KmmtpC10EnoylCoAMAT,
KmmtpNADMAT, KmmtpCoAMAT, KmmtpC6AcylCoAMAT, KmmtpC16AcylCoAMAT,
KmmtpC14AcylCoAMAT, KmmtpC12AcylCoAMAT, KmmtpC10AcylCoAMAT,
KmmtpC8AcylCoAMAT, KmmtpNADHMAT, KmmtpAcetylCoAMAT, KicrotC4AcetoacylCoA,
Keqmpc, C8EnoylCoAMAT [t], C16EnoylCoAMAT [t], C14EnoylCoAMAT [t],
C12EnoylCoAMAT [t], C10EnoylCoAMAT [t], NADtMAT, CoAMAT, C6AcylCoAMAT [t],
C16AcylCoAMAT [t], C14AcylCoAMAT [t], C12AcylCoAMAT [t], C10AcylCoAMAT [t],
C8AcylCoAMAT [t], NADHMAT [t], AcetylCoAMAT [t], C4AcetoacylCoAMAT [t]],
vacesink → RES[Ksacesink, AcetylCoAMAT [t], K1acesink],
vfadhsink → RES[Ksfadhsink, FADHMAT [t], K1fadhsink],
vnadhsink → RES[Ksnadhsink, NADHMAT [t], K1nadhsink]};

```

CoAMATX =

```

{CoAMAT → CoAMATt - C16AcylCoAMAT [t] - C16EnoylCoAMAT [t] - C16HydroxyacylCoAMAT [t] -
C16KetoacylCoAMAT [t] - C14AcylCoAMAT [t] - C14EnoylCoAMAT [t] -
C14HydroxyacylCoAMAT [t] - C14KetoacylCoAMAT [t] - C12AcylCoAMAT [t] -
C12EnoylCoAMAT [t] - C12HydroxyacylCoAMAT [t] - C12KetoacylCoAMAT [t] -
C10AcylCoAMAT [t] - C10EnoylCoAMAT [t] - C10HydroxyacylCoAMAT [t] -
C10KetoacylCoAMAT [t] - C8AcylCoAMAT [t] - C8EnoylCoAMAT [t] -
C8HydroxyacylCoAMAT [t] - C8KetoacylCoAMAT [t] - C6AcylCoAMAT [t] - C6EnoylCoAMAT [t] -
C6HydroxyacylCoAMAT [t] - C6KetoacylCoAMAT [t] - C4AcylCoAMAT [t] - C4EnoylCoAMAT [t] -
C4HydroxyacylCoAMAT [t] - C4AcetoacylCoAMAT [t] - AcetylCoAMAT [t]};

```

Parm = {

```

sfcp1C16 → 1, Kmcpt1C16AcylCoACYT → 13.8,
Kmcpt1CarCYT → 500, Kmcpt1C16AcylCarCYT → 136, Kmcpt1CoACYT → 40.7,
Kicpt1MalCoACYT → 0.2, Keqcpt1 → 0.45, ncpt1 → 2.4799,
KmcactC16AcylCarCYT → 15, KmcactC14AcylCarCYT → 15, KmcactC12AcylCarCYT → 15,
KmcactC10AcylCarCYT → 15, KmcactC8AcylCarCYT → 15, KmcactC6AcylCarCYT → 15,
KmcactC4AcylCarCYT → 15, KmcactCarMAT → 130, KmcactC16AcylCarMAT → 15,
KmcactC14AcylCarMAT → 15, KmcactC12AcylCarMAT → 15, KmcactC10AcylCarMAT → 15,
KmcactC8AcylCarMAT → 15, KmcactC6AcylCarMAT → 15, KmcactC4AcylCarMAT → 15,
KmcactCarCYT → 130, KicactC16AcylCarCYT → 56, KicactC14AcylCarCYT → 56,
KicactC12AcylCarCYT → 56, KicactC10AcylCarCYT → 56, KicactC8AcylCarCYT → 56,
KicactC6AcylCarCYT → 56, KicactC4AcylCarCYT → 56, KicactCarCYT → 200, Keqcact → 1,
sfcp2C16 → 1.0, sfcp2C14 → 1, sfcp2C12 → 0.42, sfcp2C10 → 0.39, sfcp2C8 → 0.20,
sfcp2C6 → 0.02, sfcp2C4 → 0.002, Kmcpt2C16AcylCarMAT → 51, Kmcpt2C14AcylCarMAT → 51,
Kmcpt2C12AcylCarMAT → 51, Kmcpt2C10AcylCarMAT → 51, Kmcpt2C8AcylCarMAT → 51,
Kmcpt2C6AcylCarMAT → 51, Kmcpt2C4AcylCarMAT → 51, Kmcpt2CoAMAT → 30,
Kmcpt2C16AcylCoAMAT → 2.75, Kmcpt2C14AcylCoAMAT → 19.1, Kmcpt2C12AcylCoAMAT → 15.0,
Kmcpt2C10AcylCoAMAT → 326, Kmcpt2C8AcylCoAMAT → 140 235, Kmcpt2C6AcylCoAMAT → 79.4,
Kmcpt2C4AcylCoAMAT → 28 116, Kmcpt2CarMAT → 350, Keqcpt2 → 2.22,
sfvlcadC16 → 0.8, sfvlcadC14 → 0.46, sfvlcadC12 → 0.08, KmvlcadC16AcylCoAMAT → 6.5,
KmvlcadC14AcylCoAMAT → 8, KmvlcadC12AcylCoAMAT → 1, KmvlcadFAD → 0.12,
KmvlcadC16EnoylCoAMAT → 1.08, KmvlcadC14EnoylCoAMAT → 1.08,
KmvlcadC12EnoylCoAMAT → 1.08, KmvlcadFADH → 24.2, Keqvlcad → 6,
sflcadC16 → 0.68, sflcadC14 → 0.69, sflcadC12 → 0.8, sflcadC10 → 0.59,
sflcadC8 → 0.72, KmlcadC16AcylCoAMAT → 2.52, KmlcadC14AcylCoAMAT → 46.3,
KmlcadC12AcylCoAMAT → 35.3, KmlcadC10AcylCoAMAT → 23.4, KmlcadC8AcylCoAMAT → 123,

```

KmlcadFAD → 0.12, KmlcadC16EnoylCoAMAT → 1.08, KmlcadC14EnoylCoAMAT → 1.08,  
 KmlcadC12EnoylCoAMAT → 1.08, KmlcadC10EnoylCoAMAT → 1.08,  
 KmlcadC8EnoylCoAMAT → 1.08, KmlcadFADH → 24.2, Keqlcad → 6,  
 sfmcadC12 → 0.15, sfmcadC10 → 1, sfmcadC8 → 0.89, sfmcadC6 → 0.73,  
 sfmcadC4 → 1, KmmcadC12AcylCoAMAT → 63.6, KmmcadC10AcylCoAMAT → 1,  
 KmmcadC8AcylCoAMAT → 1, KmmcadC6AcylCoAMAT → 4.1, KmmcadC4AcylCoAMAT → 135,  
 KmmcadFAD → 0.12, KmmcadC12EnoylCoAMAT → 1.08, KmmcadC10EnoylCoAMAT → 1.08,  
 KmmcadC8EnoylCoAMAT → 1.08, KmmcadC6EnoylCoAMAT → 1.08,  
 KmmcadC4EnoylCoAMAT → 1.08, KmmcadFADH → 24.2, Keqmcad → 6,  
 sfscadC6 → 1, sfscadC4 → 1, KmScadC6AcylCoAMAT → 285,  
 KmScadC4AcylCoAMAT → 5.78, KmScadFAD → 0.12, KmScadC6EnoylCoAMAT → 1.08,  
 KmScadC4EnoylCoAMAT → 1.08, KmScadFADH → 24.2, Keqscad → 6,  
 sfcrotC16 → 0.13, sfcrotC14 → 0.2, sfcrotC12 → 0.25, sfcrotC10 → 0.33,  
 sfcrotC8 → 0.58, sfcrotC6 → 0.83, sfcrotC4 → 1, KmcrotC16EnoylCoAMAT → 150,  
 KmcrotC14EnoylCoAMAT → 100, KmcrotC12EnoylCoAMAT → 25, KmcrotC10EnoylCoAMAT → 25,  
 KmcrotC8EnoylCoAMAT → 25, KmcrotC6EnoylCoAMAT → 25, KmcrotC4EnoylCoAMAT → 40,  
 KmcrotC16HydroxyacylCoAMAT → 45, KmcrotC14HydroxyacylCoAMAT → 45,  
 KmcrotC12HydroxyacylCoAMAT → 45, KmcrotC10HydroxyacylCoAMAT → 45,  
 KmcrotC8HydroxyacylCoAMAT → 45, KmcrotC6HydroxyacylCoAMAT → 45,  
 KmcrotC4HydroxyacylCoAMAT → 45, KicrotC4AcetoacylCoA → 1.6, Keqcrot → 3.13,  
 sfmschadC16 → 0.6, sfmschadC14 → 0.5, sfmschadC12 → 0.43,  
 sfmschadC10 → 0.64, sfmschadC8 → 0.89, sfmschadC6 → 1, sfmschadC4 → 0.67,  
 KmmschadC16HydroxyacylCoAMAT → 1.5, KmmschadC14HydroxyacylCoAMAT → 1.8,  
 KmmschadC12HydroxyacylCoAMAT → 3.7, KmmschadC10HydroxyacylCoAMAT → 8.8,  
 KmmschadC8HydroxyacylCoAMAT → 16.3, KmmschadC6HydroxyacylCoAMAT → 28.6,  
 KmmschadC4HydroxyacylCoAMAT → 69.9, KmmschadNADMAT → 58.5,  
 KmmschadC16KetoacylCoAMAT → 1.4, KmmschadC14KetoacylCoAMAT → 1.4,  
 KmmschadC12KetoacylCoAMAT → 1.6, KmmschadC10KetoacylCoAMAT → 2.3,  
 KmmschadC8KetoacylCoAMAT → 4.1, KmmschadC6KetoacylCoAMAT → 5.8,  
 KmmschadC4AcetoacylCoAMAT → 16.9, KmmschadNADHMAT → 5.4, Keqmschad →  $2.17 * 10^{-4}$ ,  
 sfmckatC16 → 0, sfmckatC14 → 0.2, sfmckatC12 → 0.38, sfmckatC10 → 0.65,  
 sfmckatC8 → 0.81, sfmckatC6 → 1, sfmckatC4 → 0.49, KmmckatC16KetoacylCoAMAT → 1.1,  
 KmmckatC14KetoacylCoAMAT → 1.2, KmmckatC12KetoacylCoAMAT → 1.3,  
 KmmckatC10KetoacylCoAMAT → 2.1, KmmckatC8KetoacylCoAMAT → 3.2,  
 KmmckatC6KetoacylCoAMAT → 0.67, KmmckatC4AcetoacylCoAMAT → 1.24,  
 KmmckatCoAMAT → 26.6, KmmckatC14AcylCoAMAT → 13.83, KmmckatC16AcylCoAMAT → 13.83,  
 KmmckatC12AcylCoAMAT → 13.83, KmmckatC10AcylCoAMAT → 13.83,  
 KmmckatC8AcylCoAMAT → 13.83, KmmckatC6AcylCoAMAT → 13.83,  
 KmmckatC4AcylCoAMAT → 13.83, KmmckatAcetylCoAMAT → 30, Keqmckat → 1051,  
 sfmtpC16 → 1, sfmtpC14 → 0.9, sfmtpC12 → 0.81, sfmtpC10 → 0.73, sfmtpC8 → 0.34,  
 KmmtpC16EnoylCoAMAT → 25, KmmtpC14EnoylCoAMAT → 25, KmmtpC12EnoylCoAMAT → 25,  
 KmmtpC10EnoylCoAMAT → 25, KmmtpC8EnoylCoAMAT → 25, KmmtpNADMAT → 60,  
 KmmtpCoAMAT → 30, KmmtpC14AcylCoAMAT → 13.83, KmmtpC16AcylCoAMAT → 13.83,  
 KmmtpC12AcylCoAMAT → 13.83, KmmtpC10AcylCoAMAT → 13.83, KmmtpC8AcylCoAMAT → 13.83,  
 KmmtpC6AcylCoAMAT → 13.83, KmmtpNADHMAT → 50, KmmtpAcetylCoAMAT → 30, Keqmtpt → 0.71,  
 Ksacesink → 6000000, K1acesink → 70, Ksfadhsink → 6000000,  
 K1fadhsink → 0.46, Ksnadhsink → 6000000, K1nadhsink → 16, Kmdummy →  $1 * 10^{20}$ ,  
 C16AcylCoACYT → 25., CarCYT → 200., CoACYT → 140, MalCoACYT → 0.2,  
 CarMAT → 950, FADtMAT → 0.77, NADtMAT → 250, CoAMATt → 5000,  
 VCYT →  $2.2 * 10^{-6}$ , VMAT →  $1.8 * 10^{-6}$ };

```

Parm2 = {Vmckat → 0.012, Vmcd → 0.032, Vscad → 0.019,
  Vv1cad → 0.005, Vcpt1 → 0.008, Vcpt2 → 0.005, Vcrot → 3, Vmschad → 0.09,
  Vmtp → 0.116, Vfcaact → 0.42, Vrcact → 0.42, Vl1cad → 0.035};

InitialConditions = {
  C16AcylCarCYT[0] == 0, C16AcylCarMAT[0] == 0, C16AcylCoAMAT[0] == 0,
  C16EnoylCoAMAT[0] == 0, C16HydroxyacylCoAMAT[0] == 0, C16KetoacylCoAMAT[0] == 0,
  C14AcylCarCYT[0] == 0.0, C14AcylCarMAT[0] == 0, C14AcylCoAMAT[0] == 0,
  C14EnoylCoAMAT[0] == 0, C14HydroxyacylCoAMAT[0] == 0, C14KetoacylCoAMAT[0] == 0,
  C12AcylCarCYT[0] == 0.0, C12AcylCarMAT[0] == 0, C12AcylCoAMAT[0] == 0,
  C12EnoylCoAMAT[0] == 0, C12HydroxyacylCoAMAT[0] == 0, C12KetoacylCoAMAT[0] == 0,
  C10AcylCarCYT[0] == 0.0, C10AcylCarMAT[0] == 0, C10AcylCoAMAT[0] == 0,
  C10EnoylCoAMAT[0] == 0, C10HydroxyacylCoAMAT[0] == 0, C10KetoacylCoAMAT[0] == 0,
  C8AcylCarCYT[0] == 0.0, C8AcylCarMAT[0] == 0, C8AcylCoAMAT[0] == 0,
  C8EnoylCoAMAT[0] == 0, C8HydroxyacylCoAMAT[0] == 0, C8KetoacylCoAMAT[0] == 0,
  C6AcylCarCYT[0] == 0.0, C6AcylCarMAT[0] == 0, C6AcylCoAMAT[0] == 0,
  C6EnoylCoAMAT[0] == 0, C6HydroxyacylCoAMAT[0] == 0, C6KetoacylCoAMAT[0] == 0,
  C4AcylCarCYT[0] == 0.0, C4AcylCarMAT[0] == 0, C4AcylCoAMAT[0] == 0,
  C4EnoylCoAMAT[0] == 0, C4HydroxyacylCoAMAT[0] == 0, C4AcetoacylCoAMAT[0] == 0,
  AcetylCoAMAT[0] == 70, FADHMAT[0] == 0.46, NADHMAT[0] == 16};

Vars = {
  C16AcylCarCYT, C16AcylCarMAT, C16AcylCoAMAT,
  C16EnoylCoAMAT, C16HydroxyacylCoAMAT, C16KetoacylCoAMAT,
  C14AcylCarCYT, C14AcylCarMAT, C14AcylCoAMAT, C14EnoylCoAMAT,
  C14HydroxyacylCoAMAT, C14KetoacylCoAMAT,
  C12AcylCarCYT, C12AcylCarMAT, C12AcylCoAMAT, C12EnoylCoAMAT,
  C12HydroxyacylCoAMAT, C12KetoacylCoAMAT,
  C10AcylCarCYT, C10AcylCarMAT, C10AcylCoAMAT, C10EnoylCoAMAT,
  C10HydroxyacylCoAMAT, C10KetoacylCoAMAT,
  C8AcylCarCYT, C8AcylCarMAT, C8AcylCoAMAT, C8EnoylCoAMAT,
  C8HydroxyacylCoAMAT, C8KetoacylCoAMAT,
  C6AcylCarCYT, C6AcylCarMAT, C6AcylCoAMAT, C6EnoylCoAMAT,
  C6HydroxyacylCoAMAT, C6KetoacylCoAMAT,
  C4AcylCarCYT, C4AcylCarMAT, C4AcylCoAMAT, C4EnoylCoAMAT,
  C4HydroxyacylCoAMAT, C4AcetoacylCoAMAT,
  AcetylCoAMAT, FADHMAT, NADHMAT};

TableForm[Odes];
TableForm[RateEqs];
TableForm[Odes /. RateEqs /. CoAMATX /. Parm /. Parm2];
TableForm[RateEqs /. Parm /. Parm2];
TableForm[InitialConditions];

tsol = NDSolve[Join[Odes /. RateEqs /. CoAMATX /. Parm /. Parm2, InitialConditions],
  Vars, {t, 0, 1000}];

```



# Flux Control Analysis

```

ParallelTable[{Vars[[i]][t], (Vars[[i]][1000] /. tsol)[[1]]}, {i, 1, Length[Vars]}];
ss1 = FindRoot[
  Table[Odes[[i, 2]] == 0, {i, 1, Length[Odes]}] /. RateEqs /. CoAMATX /. Parm /. Parm2,
  %];
fluxes1 = RateEqs /. CoAMATX /. Parm /. Parm2 /. ss1;
Metabolites =
  TableForm[ParallelTable[{ss1[[i]][[1]], ss1[[i]][[2]]}, {i, 1, Length[ss1]}]];
Flux = TableForm[ParallelTable[{fluxes1[[i]][[1]], fluxes1[[i]][[2]]},
  {i, 1, Length[fluxes1]}]];

FCCMuscle[zstart_, dz_, zend_] := Monitor[Module[{vector2},
  k = {0.1, 0.5, 1.0, 2.0, 3.0, 4.0, 5.0, 6.0, 7.0, 8.0, 9.0, 10.0};
  Uptakefluxesallanimals = {};
  FCCvector = {};
  a = newvmaxes[[1]];
  Alldeltacalculations = {};
  AllFCCcalculations = {};
  For[z = zstart, z ≤ zend,

    vectorvmaxes = {0};
    For[i = 2, i ≤ 12, i++,
      AppendTo[vectorvmaxes, newvmaxes[[i, z]]];
    ];

    FCCvector = {};
    FCCmatrix = {};
    Uptakefluxesallanimals = {};

    For[x = 1, x ≤ Length[vectorvmaxes], x++,
      delta = 0.000001;
      vector2 = vectorvmaxes;
      cd = N[vector2[[x]] * (1 + delta), 30];
      vector2[[x]] = cd;

      Parm2replaced =
        {Vmckat → vector2[[2]], Vmcd → vector2[[3]], Vscad → vector2[[4]],
          Vvlcd → vector2[[5]], Vcpt1 → vector2[[6]], Vcpt2 → vector2[[7]],
          Vcrot → vector2[[8]], Vmschad → vector2[[9]], Vmtp → vector2[[10]],
          Vfcact → vector2[[11]], Vrcact → vector2[[11]], Vlcd → vector2[[12]]};

      tsol0 = ParallelTable[
        NDSolve[Join[Odes /. RateEqs /. CoAMATX /. ReplacePart[Parm, Position[Parm,
          C16AcylCoACYT][[1, 1]] → C16AcylCoACYT → k[[j]]] /. Parm2replaced,
          ReplacePart[InitialConditions, {ii_, 2} := ss1[[ii, 2]]], Vars,
          {t, 0, 1000}], {j, 1, Length[k]}];
      ssp0 = Table[FindRoot[Table[Odes[[i, 2]] == 0, {i, 1, Length[Odes]}] /. RateEqs /.
        CoAMATX /. ReplacePart[Parm, Position[Parm, C16AcylCoACYT][[1, 1]] →

```

```

C16AcylCoACYT → k[[j]] /. Parm2replaced,
ParallelTable[{Vars[[i]][t], (Vars[[i]][1000] /. tsol0[[j]])[[1]]},
{i, 1, Length[Vars]}], {j, 1, Length[k]};

Jk = ParallelTable[RateEqs[[All, 2]] /. CoAMATX /. ReplacePart[Parm,
Position[Parm, C16AcylCoACYT][[1, 1]] → C16AcylCoACYT → k[[j]] /.
Parm2replaced /. ssp0[[j]], {j, 1, Length[k]}];
J0 = TableForm[ParallelTable[Jk[[j, m]], {j, 1, Length[k]},
{m, 1, Length[RateEqs]}];

Jknames = fluxes1[[All, 1]];
Metk = ParallelTable[ssp0[[j, All, 2]], {j, 1, Length[k]}];
Met0 = TableForm[Metk];
Metknames = ss1[[All, 1]];
Jkmat = ConstantArray[0, {Length[Jk[[1]]], Length[Jk[[All, 1]] + 1]};

For[i = 1, i ≤ Length[Jk[[1]]], i++,
Jkmat[[i, 1]] = Jknames[[i]];
For[j = 1, j ≤ Length[Jk], j++,
Jkmat[[i, j + 1]] = Jk[[j, i]]
]
];

AppendTo[Uptakefluxesallanimals, Jkmat[[1]]];
];
For[xy = 2, xy ≤ Length[Uptakefluxesallanimals], xy++,
For[yz = 2, yz ≤ Length[Uptakefluxesallanimals[[1]]], yz++,

Jk1 = N[Uptakefluxesallanimals[[xy, yz]], 30];
Jk0 = N[Uptakefluxesallanimals[[1, yz]], 30];

DJK = Jk1 - Jk0;
DVmax = N[vectorvmaxes[[xy]] * delta, 30];
FCC = N[(DJK * vectorvmaxes[[xy]]) / (DVmax * Jk0), 30];
AppendTo[FCCvector, FCC];
];
AppendTo[FCCmatrix, FCCvector];
FCCvector = {};
];

string1 = "C:\\FCC_";
string2 = ToString[z - 1];
string3 = ToString[newvmaxes[[1, z]]];
string4 = ".xls";
filename = StringJoin[string1, string2, "_", string3, string4];

Export[filename,
{"PCoA" → k, "FCC" → FCCmatrix, "EnzymeIDs" → newvmaxes[[2 ;; 12, 1]]};
z = z + dz;]
], ProgressIndicator[z, {zstart, zend}]];

```

```

ParallelTable[{Vars[[i]][t], (Vars[[i]][1000] /. tsol)[[1]]}, {i, 1, Length[Vars]};
ss1 = FindRoot[
  Table[Odes[[i, 2]] == 0, {i, 1, Length[Odes]}] /. RateEqs /. CoAMATX /. Parm /. Parm2,
  %];
fluxes1 = RateEqs /. CoAMATX /. Parm /. Parm2 /. ss1;
Metabolites =
  TableForm[ParallelTable[{ss1[[i]][[1]], ss1[[i]][[2]]}, {i, 1, Length[ss1]}]];
Flux = TableForm[ParallelTable[{fluxes1[[i]][[1]], fluxes1[[i]][[2]]},
  {i, 1, Length[fluxes1]}]];

```

### Import data

```
newvmaxes = Import["C:\\vmaxestable_estimatedCPT1.csv", "Data"];
```

### Run function FCCMuscle

```
FCCMuscle[2, 1, Length[newvmaxes[[1]]]
```

### FCC results exported within each loop

---

## Steady-state values

```

ParallelTable[{Vars[[i]][t], (Vars[[i]][1000] /. tsol)[[1]]}, {i, 1, Length[Vars]};
ss1 = FindRoot[
  Table[Odes[[i, 2]] == 0, {i, 1, Length[Odes]}] /. RateEqs /. CoAMATX /. Parm /. Parm2,
  %]
fluxes1 = RateEqs /. CoAMATX /. Parm /. Parm2 /. ss1
Metabolites =
  TableForm[ParallelTable[{ss1[[i]][[1]], ss1[[i]][[2]]}, {i, 1, Length[ss1]}]]
Flux = TableForm[ParallelTable[
  {fluxes1[[i]][[1]], fluxes1[[i]][[2]]}, {i, 1, Length[fluxes1]}]]

CoAMAT1 = CoAMATt - C16AcylCoAMAT[t] - C16EnoylCoAMAT[t] - C16HydroxyacylCoAMAT[t] -
  C16KetoacylCoAMAT[t] - C14AcylCoAMAT[t] - C14EnoylCoAMAT[t] -
  C14HydroxyacylCoAMAT[t] - C14KetoacylCoAMAT[t] - C12AcylCoAMAT[t] -
  C12EnoylCoAMAT[t] - C12HydroxyacylCoAMAT[t] - C12KetoacylCoAMAT[t] -
  C10AcylCoAMAT[t] - C10EnoylCoAMAT[t] - C10HydroxyacylCoAMAT[t] -
  C10KetoacylCoAMAT[t] - C8AcylCoAMAT[t] - C8EnoylCoAMAT[t] -
  C8HydroxyacylCoAMAT[t] - C8KetoacylCoAMAT[t] - C6AcylCoAMAT[t] -
  C6EnoylCoAMAT[t] - C6HydroxyacylCoAMAT[t] - C6KetoacylCoAMAT[t] -
  C4AcylCoAMAT[t] - C4EnoylCoAMAT[t] - C4HydroxyacylCoAMAT[t] -
  C4AcetoacylCoAMAT[t] - AcetylCoAMAT[t] /. RateEqs /. Parm /. Parm2 /. ss1

NumberForm[CoAMAT1, 16];

steadyStateMuscle[zstart_, dz_, zend_] := Monitor[Module[{vector2},
  k = {0.1, 0.5, 1.0, 1.5, 2.0, 2.5, 3.0, 3.5,
    4.0, 4.5, 5.0, 5.5, 6.0, 6.5, 7.0, 7.5, 8.0, 8.5, 9.0, 9.5, 10.0};
  Fluxesmatrix = {}];

```

```

a = newvmaxes[[1]];
animalIDs = Delete[a, 1];
For[z = zstart, z ≤ zend,
  Fluxesvector = {};
  vectorvmaxes = {0};
  For[i = 2, i ≤ 12, i++,
    AppendTo[vectorvmaxes, newvmaxes[[i, z]]];
  ];
vector2 = vectorvmaxes;
Parm2replaced =
  {Vmckat → vector2[[2]], Vmcd → vector2[[3]], Vscad → vector2[[4]],
  Vvlcd → vector2[[5]], Vcpt1 → vector2[[6]], Vcpt2 → vector2[[7]],
  Vcrot → vector2[[8]], Vmschad → vector2[[9]], Vmtp → vector2[[10]],
  Vfcact → vector2[[11]], Vrcact → vector2[[11]], Vlcd → vector2[[12]]};

tsol0 = ParallelTable[NDSolve[Join[Odes /. RateEqs /. CoAMATX /. ReplacePart[Parm,
  Position[Parm, C16AcylCoACYT][[1, 1]] → C16AcylCoACYT → k[[j]]] /.
  Parm2replaced, ReplacePart[InitialConditions, {ii_, 2} :> ss1[[ii, 2]]],
  Vars, {t, 0, 1000}], {j, 1, Length[k]}];
ssp0 = Table[FindRoot[Table[Odes[[i, 2]] == 0, {i, 1, Length[Odes]}] /. RateEqs /.
  CoAMATX /. ReplacePart[Parm, Position[Parm, C16AcylCoACYT][[1, 1]] →
  C16AcylCoACYT → k[[j]]] /. Parm2replaced,
  ParallelTable[{Vars[[i]][t], (Vars[[i]][1000] /. tsol0[[j]])[[1]]},
  {i, 1, Length[Vars]}]], {j, 1, Length[k]}];

Jk = ParallelTable[RateEqs[[All, 2]] /. CoAMATX /. ReplacePart[Parm,
  Position[Parm, C16AcylCoACYT][[1, 1]] → C16AcylCoACYT → k[[j]]] /.
  Parm2replaced /. ssp0[[j]], {j, 1, Length[k]}];
J0 = TableForm[ParallelTable[Jk[[j, m]], {j, 1, Length[k]},
  {m, 1, Length[RateEqs]}]];

Jknames = fluxes1[[All, 1]];
Metk = ParallelTable[ssp0[[j, All, 2]], {j, 1, Length[k]}];
Met0 = TableForm[Metk];
Metknames = ss1[[All, 1]];
Jkmat = ConstantArray[0, {Length[Jk[[1]]], Length[Jk[[All, 1]] + 1]};
For[i = 1, i ≤ Length[Jk[[1]]], i++,
  Jkmat[[i, 1]] = Jknames[[i]];
  For[j = 1, j ≤ Length[Jk], j++,
    Jkmat[[i, j + 1]] = Jk[[j, i]]
  ]
];
Metkmat = ConstantArray[0, {Length[Metk[[1]]], Length[Metk[[All, 1]] + 1]};
For[i = 1, i ≤ Length[Metk[[1]]], i++,
  Metkmat[[i, 1]] = Metknames[[i]];
  For[j = 1, j ≤ Length[Metk], j++,
    Metkmat[[i, j + 1]] = Metk[[j, i]]
  ]
];
Fluxesvector = Jkmat[[1]];

```

```
AppendTo[Fluxesmatrix, Fluxesvector];  
z = z + dz;]  
, ProgressIndicator[z, {zstart, zend}]]];
```

### Import data

```
newvmaxes = Import["C:\\vmaxestable_estimatedCPT1.csv", "Data"];
```

### Run function timeCourseMuscle

```
steadyStateMuscle[2, 1, Length[newvmaxes[[1]]]]
```

### Export results

```
Export["C:\\SteadyStateFluxes.xls",  
{"PCoA" → k, "AllFluxes" → Fluxesmatrix, "Animal IDS" → animalIDs}];
```
